# Supplementary material
Source: PubMed Central journal article supplement (PMC3993864)

## **SUPPLEMENTARY MATERIAL**

# **A Recyclable Polystyrene-Supported Siloxane Transfer Agent for Palladium-Catalyzed Cross-Coupling Reactions**

Minh H. Nguyen and Amos B. Smith, III\*

Department of Chemistry, Laboratory for Research on the Structure of Matter and

Monell Chemical Senses Center, University of Pennsylvania, Philadelphia,

Pennsylvania 19104, United States

smithab@sas.upenn.edu

Experimental procedures and spectral data for all new compounds, including copies of  $^1\text{H}$  and  $^{13}\text{C}$  NMR spectra.

## General

All moisture-sensitive reactions were performed using syringe-septum cap techniques under an inert atmosphere of  $N_2$ . All glassware was flame dried or dried in an oven ( $140\text{ }^\circ\text{C}$ ) for at least 4 h prior to use. Reactions were magnetically stirred unless otherwise stated. Tetrahydrofuran (THF), dichloromethane ( $CH_2Cl_2$ ) and diethyl ether ( $Et_2O$ ) were dried by passage through alumina in a Pure Solve™ PS-400 solvent purification system. Unless otherwise stated, solvents and reagents were used as received. Analytical thin layer chromatography was performed on pre-coated silica gel 60 F-254 plates (particle size 40-55 micron, 230-400 mesh) and visualized by a uv lamp or by staining with PMA (2 g phosphomolybdic acid dissolved in 20 mL absolute ethanol),  $KMnO_4$  (1.5 g of  $KMnO_4$ , 10 g of  $K_2CO_3$  and 2.5 mL of 5% aq. NaOH in 150 mL  $H_2O$ ), or CAM (4.8 g of  $(NH_4)_6Mo_7O_{24}\cdot 4H_2O$  and 0.2 g of  $Ce(SO_4)_2$  in 100 mL of a 3.5 N  $H_2SO_4$  solution). Column chromatography was performed using silica gel (Silacyle Silaflash®) P60, 40-63 micron particle size, 230-300 mesh) and compressed air pressure with commercial grade solvents. Yields refer to chromatographically and spectroscopically pure compounds, unless otherwise stated. NMR spectra were recorded at 500 MHz/125 MHz ( $^1H$  NMR/  $^{13}C$  NMR) on a Bruker Avance III 500 MHz spectrometer at 300 K. Chemical shifts are reported in parts per million with the residual solvent peak as an internal standard.  $^1H$  NMR spectra are tabulated as follows: chemical shift, multiplicity (s=singlet, d=doublet, t=triplet, q=quartet, qn=quintet, dd=doublet of doublets, ddd= doublet of doublet of doublets, dddd= doublet of doublet of doublet of doublets, dt= doublet of triplets, m=multiplet, b=broad), coupling constant and integration.  $^{13}C$  NMR spectra are tabulated by observed peak. Melting points were determined using a Thomas-Hoover capillar melting point apparatus and are uncorrected. Infrared spectra were measured on a Jasco FT/IR 480 plus

spectrometer. High-resolution mass spectra (HRMS) were obtained at the University of Pennsylvania on a Waters GCT Premier spectrometer. Elemental analysis of Si was determined by Robertson Microlit Laboratories Inc via inductively coupled plasma optical emission spectrometry (ICP-OES).

## Experimental Procedures

Cross-linker **7**,<sup>1</sup> compound **9b**<sup>2</sup> and the corresponding vinyl iodides of **8d**<sup>2</sup> and **8e**<sup>3</sup> were prepared according to previously reported procedures.

### Preparation of Organolithium Reagents **8b**, **8c**, **8d** and **8e**:

In a dried flask was added the corresponding aryl or vinyl iodide (2.0 mmol) in 1 ml THF and the solution was cooled down to  $-78\text{ }^{\circ}\text{C}$ . *t*-BuLi (2.0 equiv) was added dropwise and the obtained solution was stirred at  $-78\text{ }^{\circ}\text{C}$  for 30 mins and then at room temperature for another 30 mins. The resulting organolithium solution was then titrated with diphenylacetic acid<sup>4</sup> before use.

### Preparation of water-washed silica gel for column chromatography (where specified):

Silica gel was suspended in d.i. H<sub>2</sub>O and the slurry mixture was then packed into a prepared column. The obtained H<sub>2</sub>O-washed silica gel packed column was then rinsed with 2 column volumes of acetone, 1 column volume of EtOAc and 2 column volumes of hexanes, successively. The obtained column is then ready for use.

### Synthesis of 1-(2-bromophenyl)but-3-en-1-ol (**3**):

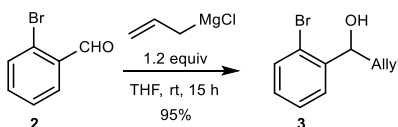

Allylmagnesium chloride (2.0 M in THF, 52.20 mL, 104.47 mmol) was added slowly to a stirred solution of 2-bromobenzaldehyde (16.11 g, 87.05 mmol) in 250 mL THF at room temperature. The obtained solution was stirred for 15 h, and was quenched with saturated aqueous NH<sub>4</sub>Cl (50 mL). The organic layer was collected and the aqueous layer was extracted with Et<sub>2</sub>O (2 x 50 mL). The combined organic layers were washed with brine, dried with MgSO<sub>4</sub>, and concentrated *in vacuo*. The crude product was purified by flash chromatography on silica gel (10% EtOAc/Hexanes) to afford the desired alcohol **3** as a pale yellow oil (18.73 g, 82.88 mmol, 95%).

**IR** (neat, cm<sup>-1</sup>) 3389 (s), 3073 (m), 2979 (m), 2912 (m), 1639 (m), 1568 (m), 1468 (s), 1439 (s), 1195 (m), 1126 (m), 1023 (s), 917 (s), 754 (s); **<sup>1</sup>H NMR** (500 MHz, CDCl<sub>3</sub>) δ 7.59-7.55 (m, 1 H), 7.52 (d, *J* = 7.9 Hz, 1 H), 7.34 (t, *J* = 7.5 Hz, 1 H), 7.16-7.11 (m, 1 H), 5.93-5.83 (m, 1 H), 5.24-5.16 (m, 2 H), 5.14-5.09 (m, 1 H), 2.69-2.62 (m, 1 H), 2.40-2.32 (m, 1 H), 2.14 (d, *J* = 3.4 Hz, 1 H); **<sup>13</sup>C NMR** (125 MHz, CDCl<sub>3</sub>) δ 142.8, 134.4, 132.8, 129.0, 127.8, 127.5, 121.9, 118.9, 72.0, 42.3; **HRMS** (CI<sup>+</sup>) *m/z* (M-C<sub>3</sub>H<sub>5</sub>)<sup>+</sup>: Calcd for C<sub>7</sub>H<sub>6</sub>OBr: 184.9602, found: 184.9608.

#### Synthesis of 3-allyl-1,1-dimethyl-1,3-dihydrobenzo[*c*][1,2]oxasilole (**4**):

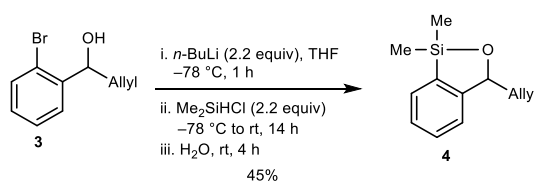

A solution of *n*-BuLi (2.55 M in hexanes, 62.10 mL, 158.30 mmol) was added dropwise to a stirred solution of benzyl alcohol **3** (16.33 g, 71.95 mmol) in 250 mL THF at -78 °C. The obtained solution was stirred for 1 h, followed by addition of Me<sub>2</sub>SiHCl (17.20 mL, 158.30 mmol) in one portion at -78 °C. The resulting reaction mixture was allowed to warm to rt and

was stirred overnight. After 14 h, the reaction mixture was quenched by addition of d.i. H<sub>2</sub>O (100 mL) and stirred for 4 h. The organic layer was collected and the aqueous layer was extracted with hexanes (2 x 50 mL). The combined organic layers were washed with brine, dried with MgSO<sub>4</sub>, and concentrated *in vacuo*. Kugelrohr distillation (50 – 140 °C, 0.025 mmHg), followed by flash chromatography on water-washed silica gel (1% Et<sub>2</sub>O/Hexanes) afforded the desired siloxane **4** as a colorless oil (6.60 g, 32.35 mmol, 45%).

**IR** (neat, cm<sup>-1</sup>) 3072 (s), 3001 (s), 2966 (s), 2931 (s), 2899 (s), 2868 (s), 1642 (m), 1595 (m), 1443 (s), 1329 (s), 1251 (s), 1137 (s), 1076 (s), 1049 (s), 988 (s), 897 (s), 825 (s), 790 (s), 744 (s), 653 (s); **<sup>1</sup>H NMR** (500 MHz, CDCl<sub>3</sub>) δ 7.56 (d, *J* = 7.1 Hz, 1 H), 7.42-7.37 (m, 1 H), 7.31 (t, *J* = 7.1 Hz, 1 H), 7.24 (d, *J* = 7.7 Hz, 1 H), 5.87-5.76 (m, 1 H), 5.30 (dd, *J* = 3.9, 7.0 Hz, 1 H), 5.14-5.04 (m, 2 H), 2.73-2.65 (m, 1 H), 2.47-2.39 (m, 1 H), 0.38 (d, *J* = 15.5 Hz, 6 H); **<sup>13</sup>C NMR** (125 MHz, CDCl<sub>3</sub>) δ 152.5, 135.9, 134.7, 131.0, 129.7, 127.2, 122.5, 117.7, 81.2, 43.5, 1.5, 0.7; **HRMS** (CI<sup>+</sup>) *m/z* (M-CH<sub>3</sub>)<sup>+</sup>: Calcd for C<sub>11</sub>H<sub>13</sub>OSi: 189.0736, found: 189.0733.

### Synthesis of 3-(3-(4-bromophenyl)propyl)-1,1-dimethyl-1,3-dihydrobenzo[*c*][1,2]oxasilole (**5**):

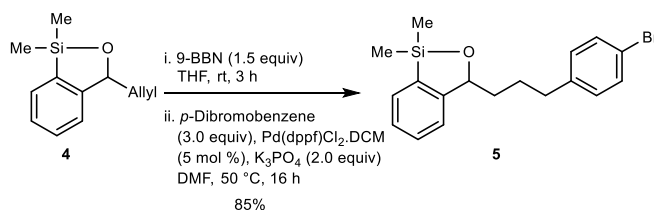

A solution of 9-BBN (0.5 M in THF, 12.15 mL, 6.08 mmol) was added dropwise to a flask containing siloxane **4** (826.3 mg, 4.05 mmol) while stirring at room temperature. The obtained solution was stirred for 3 h, at which time TLC analysis indicated consumption of the starting

material **4**. A screw-cap vial was charged with 1,4-dibromobenzene (2.87 g, 12.15 mmol), Pd(dppf)Cl<sub>2</sub>.DCM (165.4 mg, 0.203 mmol), K<sub>3</sub>PO<sub>4</sub> (1.72 g, 8.10 mmol), and the mixture was suspended in 10 mL DMF. The obtained mixture was stirred for 15 min at room temperature, followed by addition of the above solution containing siloxane **4**/9-BBN adduct via cannula (rinsed with 0.5 mL DMF). The obtained vial was capped and heated to 50 °C for 16 h. The reaction mixture was then cooled to room temperature and quenched with d.i. H<sub>2</sub>O (10 mL). The resulting mixture was extracted with Et<sub>2</sub>O (2 x 25 mL). The combined organic layers were washed with brine, dried with MgSO<sub>4</sub>, and concentrated *in vacuo*. The crude oil was then taken up in THF (10 mL), followed by addition of solid NaBO<sub>3</sub>·4H<sub>2</sub>O (3.12 g, 20.25 mmol), and d.i. H<sub>2</sub>O (10 mL) for oxidation of borane byproducts to facilitate purification. The mixture was then stirred vigorously at room temperature, open to air, for 2 h. The aqueous layer was then extracted with hexanes (2 x 25 mL). The combined organic layers were washed with brine, dried with MgSO<sub>4</sub>, and concentrated *in vacuo*. Kugelrohr distillation (180 °C, 0.025 mmHg) afforded the desired aryl bromide **5** as pale yellow oil (1.25 g, 3.46 mmol, 85%).

**IR** (neat, cm<sup>-1</sup>) 3058 (m), 2999 (m), 2942 (s), 2860 (s), 1593 (m), 1487 (s), 1442 (m), 1252 (s), 1077 (s), 1012 (m), 949 (m), 876 (s), 818 (s), 790 (s), 749 (s); **<sup>1</sup>H NMR** (500 MHz, CDCl<sub>3</sub>) δ 7.54 (d, *J* = 7.1 Hz, 1 H), 7.41-7.35 (m, 3 H), 7.29 (t, *J* = 7.1 Hz, 1 H), 7.15 (d, *J* = 7.7 Hz, 1 H), 7.03 (d, *J* = 8.3 Hz, 2 H), 5.25 (dd, *J* = 3.3, 7.4 Hz, 1 H), 2.68-2.53 (m, 2 H), 1.98-1.90 (m, 1 H), 1.82-1.59 (m, 3 H), 0.37 (d, *J* = 4.8 Hz, 6 H); **<sup>13</sup>C NMR** (125 MHz, CDCl<sub>3</sub>) δ 153.0, 141.5, 135.7, 131.4, 131.0, 130.3, 129.8, 127.1, 122.3, 119.5, 81.5, 38.3, 35.3, 26.5, 1.5, 0.7; **HRMS** (CI<sup>+</sup>) *m/z* (M)<sup>+</sup>: Calcd for C<sub>18</sub>H<sub>21</sub>OBrSi: 360.0545, found: 360.0529.

## Synthesis of 1,1-dimethyl-3-(3-(4-vinylphenyl)propyl)-1,3-dihydrobenzo[c][1,2]oxasilole (**6**):

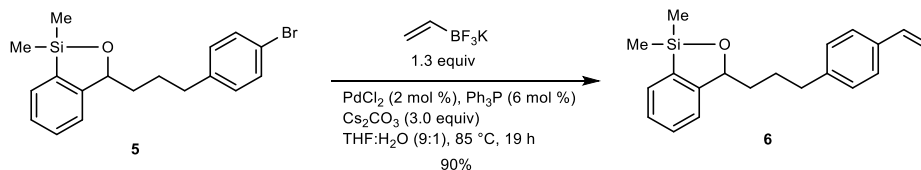

A solution of potassium vinyltrifluoroborate (336.6 mg, 2.51 mmol),  $\text{PdCl}_2$  (6.9 mg, 0.039 mmol),  $\text{PPh}_3$  (30.4 mg, 0.116 mmol),  $\text{Cs}_2\text{CO}_3$  (1.89 g, 5.80 mmol), and aryl bromide **5** (698.5 mg, 1.93 mmol) in THF/H<sub>2</sub>O (9:1, 4.1 mL) was heated at 85 °C in a screw-cap vial. The reaction mixture was stirred at 85 °C for 19 h, then cooled to room temperature and diluted with H<sub>2</sub>O (5 mL), followed by extraction with dichloromethane (2 x 10 mL). The combined organic layers were washed with brine, dried with  $\text{MgSO}_4$ , and concentrated *in vacuo*. Purification via flash chromatography on water-washed silica gel (1% Et<sub>2</sub>O/Hexanes) afforded the desired styrene **6** as a colorless oil (536.7 mg, 1.74 mmol, 90%).

**IR** (neat,  $\text{cm}^{-1}$ ) 3055 (m), 3001 (m), 2941 (s), 2858 (s), 1629 (m), 1511 (m), 1442 (m), 1406 (m), 1330 (m), 1252 (s), 1137 (m), 1085 (s), 1023 (m), 989 (m), 947 (m), 876 (s), 823 (s), 790 (s), 748 (s); **<sup>1</sup>H NMR** (500 MHz,  $\text{CDCl}_3$ )  $\delta$  7.54 (d,  $J = 7.1$  Hz, 1 H), 7.40-7.35 (m, 1 H), 7.33-7.26 (m, 3 H), 7.16 (d,  $J = 7.7$  Hz, 1 H), 7.12 (d,  $J = 7.9$  Hz, 2 H), 6.69 (dd,  $J = 10.9, 17.6$  Hz, 1 H), 5.70 (d,  $J = 17.6$  Hz, 1 H), 5.26 (dd,  $J = 3.2, 7.3$  Hz, 1 H), 5.18 (d,  $J = 10.9$  Hz, 1 H), 2.72-2.57 (m, 2 H), 2.01-1.90 (m, 1 H), 1.84-1.59 (m, 3 H), 0.38 (d,  $J = 7.1$  Hz, 6 H); **<sup>13</sup>C NMR** (125 MHz,  $\text{CDCl}_3$ )  $\delta$  153.1, 142.3, 136.9, 135.7, 135.2, 131.0, 129.7, 128.7, 127.0, 126.3, 122.3, 113.0, 81.6, 38.4, 35.6, 26.5, 1.5, 0.7; **HRMS** ( $\text{CI}^+$ )  $m/z$  ( $\text{M}^+$ ): Calcd for  $\text{C}_{20}\text{H}_{24}\text{OSi}$ : 308.1596, found: 308.1581.

## Synthesis of PSTA-II:

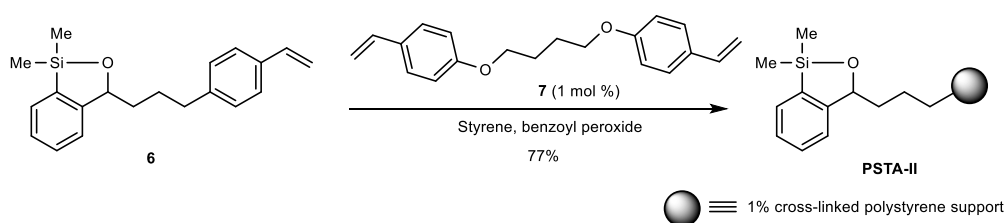

A solution of acacia gum (3.2 g) and NaCl (2.0 g) in H<sub>2</sub>O (85 mL) was placed in a 100 mL-reaction flask equipped with a mechanical stirrer and deoxygenated by purging with N<sub>2</sub> for 30 min. A solution of monomer **6** (433 mg, 1.40 mmol), styrene (1.20 mL, 10.47 mmol), cross-linker **7** (34.9 mg, 0.119 mmol), and benzoyl peroxide (20.0 mg, 0.083 mmol) in chlorobenzene (2.0 mL) was injected to the rapidly stirred aqueous solution. This mixture was heated at 85 °C for 17 h. The crude polymer was collected by filtration and washed sequentially with MeOH/H<sub>2</sub>O (3:1, 4 x 50 mL), MeOH (2 x 50 mL), THF (2 x 25 mL), Et<sub>2</sub>O (2 x 25 mL), hexanes (2 x 25 mL), followed by drying *in vacuo* to provide the desired polymer **PSTA-II** as white beads (724 mg) and a Si loading of 1.49 mmol/g was determined by inductively coupled plasma optical emission spectrometry (ICP-OES). The yield was 77% based on Si incorporation.

**IR** (KBr, cm<sup>-1</sup>) 3026 (s), 2914 (s), 1943 (m), 1872 (m), 1803 (m), 1721 (s), 1492 (s), 1448 (s), 1372 (s), 1329 (s), 1249 (s), 1179 (m), 1082 (s), 1026 (s), 945 (m), 875 (m), 819 (m), 789 (m), 743 (s), 698 (s).



## Procedure for Recyclability of PSTA-II Using the Same Nucleophile and Electrophile:

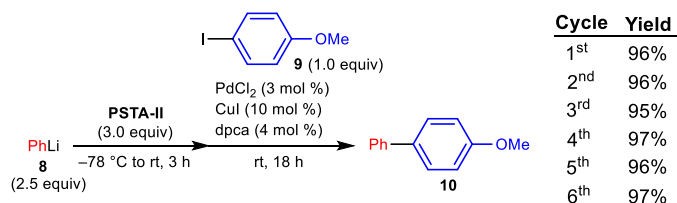

To a cooled suspension of siloxane polymer **PSTA-II** (1.49 mmol/g, 500 mg, 0.745 mmol) swelling in THF (20 mL) at  $-78\text{ }^{\circ}\text{C}$  was added PhLi in Bu<sub>2</sub>O (1.8 M, 345  $\mu\text{L}$ , 0.621 mmol) dropwise. The reaction mixture was allowed to warm to room temperature and was stirred for 3 h. A solid mixture of PdCl<sub>2</sub> (1.3 mg, 7.4  $\mu\text{mol}$ ), CuI (4.7 mg, 24.8  $\mu\text{mol}$ ), and dpca (3.7 mg, 9.9  $\mu\text{mol}$ ) was combined and added to the reaction flask, followed by addition of 4-iodoanisole (58.0 mg, 0.248 mmol). The obtained reaction mixture was stirred vigorously at room temperature for 18 h. The reaction mixture was then quenched with sat. aq. NH<sub>4</sub>Cl (5 mL), followed by addition of d.i. H<sub>2</sub>O (5 mL), and stirred for an hour at room temperature. The obtained mixture was filtered through a fritted filter to remove polymer. The filtered polymer was then washed with Et<sub>2</sub>O (4 x 50 mL). The combined filtrate was washed with brine, dried with MgSO<sub>4</sub>, and concentrated *in vacuo*, followed by purification via flash chromatography (1% Et<sub>2</sub>O/ hexanes) to provide the desired cross-coupling product 4-phenylanisole **10** as a white solid (43.8 mg, 0.238 mmol, 96%). Following filtration, the polymer was further washed sequentially with MeOH/H<sub>2</sub>O solution (1:1, 2 x 50 mL), MeOH (2 x 25 mL), CH<sub>2</sub>Cl<sub>2</sub> (2 x 25 mL), Et<sub>2</sub>O (2 x 25 mL), hexanes (2 x 25 mL), and dried *in vacuo* to provide near quantitative recovery of siloxane polymer.

The obtained polymer was re-used 5 more times employing the same procedure above and showed no loss in cross-coupling efficiency.

## General Procedure for Recyclability of PSTA-II Using Multiple Nucleophiles and Electrophiles:

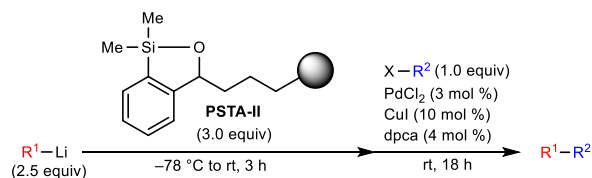

To a cooled suspension of siloxane polymer **PSTA-II** (0.74 mmol/g, 3.0 equiv) swelling in THF (25 mL) at  $-78\text{ }^\circ\text{C}$  was added the organolithium solution (2.5 equiv) dropwise. The reaction mixture was allowed to warm to room temperature and was stirred for 3 h. A solid mixture of  $\text{PdCl}_2$  (3 mol %),  $\text{CuI}$  (10 mol %), and  $\text{dpca}$  (4 mol %) was combined and added to the reaction flask, followed by addition of the aryl or alkenyl halide (1.0 equiv). The obtained reaction mixture was stirred vigorously at room temperature for 18 h. The reaction mixture was then quenched with sat. aq.  $\text{NH}_4\text{Cl}$  (5 mL), followed by addition of d.i.  $\text{H}_2\text{O}$  (5 mL), and stirred for an hour at room temperature. The obtained mixture was filtered through a fritted filter to remove polymer. The filtered polymer was then washed with  $\text{Et}_2\text{O}$  (4 x 50 mL). The combined filtrate was washed with brine, dried with  $\text{MgSO}_4$ , and concentrated *in vacuo*, followed by purification via flash chromatography to provide the desired cross-coupling product. Following filtration, the polymer was further washed sequentially with  $\text{MeOH}/\text{H}_2\text{O}$  solution (1:1, 2 x 50 mL),  $\text{MeOH}$  (2 x 25 mL),  $\text{CH}_2\text{Cl}_2$  (2 x 25 mL),  $\text{Et}_2\text{O}$  (2 x 25 mL), hexanes (2 x 25 mL), and dried *in vacuo* to provide near quantitative recovery of siloxane polymer, which was employed in the next cross-coupling cycle.

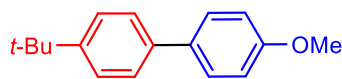**10b**

**4-(tert-butyl)-4'-methoxy-1,1'-biphenyl:** Following general

procedure, using PSTA-II (750 mg, 0.555 mmol), **8b** (926  $\mu$ L, 0.50 M, 0.463 mmol), PdCl<sub>2</sub> (1.0 mg, 5.6  $\mu$ mol), dpca (2.7 mg, 7.4  $\mu$ mol), CuI (3.5 mg, 18.5  $\mu$ mol) and **9** (42.0 mg, 0.180 mmol). The product was purified by chromatography on SiO<sub>2</sub> (1% Et<sub>2</sub>O/ hexanes) to afford **10b** (41.2 mg, 0.172 mmol, 95%) as a colorless solid. Analytical data matches that which has been previously reported for **10b**:<sup>5</sup> **<sup>1</sup>H NMR** (500 MHz, CDCl<sub>3</sub>)  $\delta$  7.57-7.49 (m, 4 H), 7.48-7.44 (m, 2 H), 6.98 (d,  $J$  = 8.7 Hz, 2 H), 3.86 (s, 3 H), 1.38 (s, 9 H); **<sup>13</sup>C NMR** (125 MHz, CDCl<sub>3</sub>)  $\delta$  159.1, 149.8, 138.1, 133.8, 128.1, 126.5, 125.8, 114.3, 55.5, 34.6, 31.5.

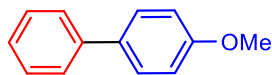**10**

**4-Phenylanisole:** Following general procedure, using PSTA-II (720 mg,

0.533 mmol), **8** (234  $\mu$ L, 1.9 M, 0.444 mmol), PdCl<sub>2</sub> (0.9 mg, 5.3  $\mu$ mol), dpca (2.6 mg, 7.1  $\mu$ mol), CuI (3.4 mg, 17.8  $\mu$ mol) and **9** (41.6 mg, 0.178 mmol). The product was purified by chromatography on SiO<sub>2</sub> (1% Et<sub>2</sub>O/ hexanes) to afford **10** (31.8 mg, 0.173 mmol, 97%) as a colorless solid. Analytical data matches that which has been previously reported for **10**:<sup>6</sup> **<sup>1</sup>H NMR** (500 MHz, CDCl<sub>3</sub>)  $\delta$  7.57-7.53 (m, 4 H), 7.42 (t,  $J$  = 7.6 Hz, 2 H), 7.31 (t,  $J$  = 7.4 Hz, 1 H), 6.99 (d,  $J$  = 8.7 Hz, 2 H), 3.86 (s, 3 H); **<sup>13</sup>C NMR** (125 MHz, CDCl<sub>3</sub>)  $\delta$  159.3, 141.0, 133.9, 128.9, 128.3, 126.9, 126.8, 114.3, 55.5.

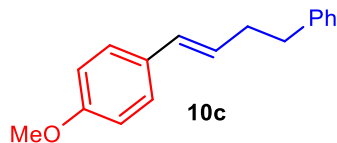

**(E)-1-methoxy-4-(4-phenylbut-1-en-1-yl)benzene:**

Following

general procedure, using PSTA-II (702 mg, 0.519 mmol), **8c** (1.2 mL, 0.36 M, 0.433 mmol), PdCl<sub>2</sub> (0.9 mg, 5.2 μmol), dpca (2.6 mg, 7.0 μmol), CuI (3.3 mg, 17.3 μmol) and **9b** (44.7 mg, 0.173 mmol). The product was purified by chromatography on SiO<sub>2</sub> (0.5 % Et<sub>2</sub>O/ hexanes) to afford **10c** (37 mg, 0.155 mmol, 90%) as a colorless solid. Analytical data matches that which has been previously reported for **10c**:<sup>7</sup> **<sup>1</sup>H NMR** (500 MHz, CDCl<sub>3</sub>) δ 7.34 – 7.18 (m, 7 H), 6.85 (d, *J* = 8.5 Hz, 2 H), 6.38 (d, *J* = 15.9 Hz, 1 H), 6.13 (td, *J* = 6.9, 15.7 Hz, 1 H), 3.82 (s, 3 H), 2.79 (t, *J* = 7.8 Hz, 2 H), 2.52 (q, *J* = 7.2 Hz, 2 H); **<sup>13</sup>C NMR** (125 MHz, CDCl<sub>3</sub>) δ 158.9, 142.3, 130.7, 129.9, 128.6, 128.5, 127.96, 127.21, 126.0, 114.1, 55.4, 36.2, 35.0.

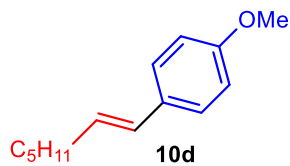

**(E)-1-(hept-1-en-1-yl)-4-methoxybenzene:** Following general procedure,

using PSTA-II (686 mg, 0.508 mmol), **8d** (1.14 mL, 0.37 M, 0.423 mmol), PdCl<sub>2</sub> (0.9 mg, 5.1 μmol), dpca (2.5 mg, 6.8 μmol), CuI (3.2 mg, 16.9 μmol) and **9** (39.6 mg, 0.169 mmol). The product was purified by chromatography on SiO<sub>2</sub> (0-0.5 % Et<sub>2</sub>O/ hexanes) to afford **10d** (25.5 mg, 0.125 mmol, 74%) as a colorless oil. Analytical data matches that which has been previously reported for **10d**:<sup>8</sup> **<sup>1</sup>H NMR** (500 MHz, CDCl<sub>3</sub>) δ 7.28 (dd, *J* = 2.0, 6.5 Hz, 2 H), 6.84 (dd, *J* = 2.1, 6.6 Hz, 2 H), 6.32 (d, *J* = 15.7 Hz, 1 H), 6.09 (dt, *J* = 7.2, 15.8 Hz, 1 H), 3.80 (s, 3 H), 2.18 (qd, *J* = 1.3, 7.3 Hz, 2 H), 1.46 (qn, *J* = 7.2 Hz, 2 H), 1.40-1.37 (m, 4 H), 0.90 (t, *J* = 7.1 Hz, 3

H);  $^{13}\text{C}$  NMR (125 MHz,  $\text{CDCl}_3$ )  $\delta$  158.6, 131.2, 129.6, 129.5, 127.1, 114.2, 55.7, 33.5, 31.4, 29.5, 22.7, 14.1.

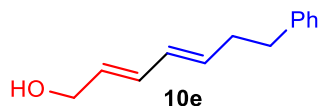

**(2E, 4E)-7-phenylhepta-2,4-dien-1-ol**: Following general procedure, using PSTA-II (662 mg, 0.490 mmol), **8e** (1.4 mL, 0.30 M, 0.408 mmol),  $\text{PdCl}_2$  (0.9 mg, 4.9  $\mu\text{mol}$ ), dpca (2.4 mg, 6.5  $\mu\text{mol}$ ),  $\text{CuI}$  (3.1 mg, 16.3  $\mu\text{mol}$ ) and **9b** (42.1 mg, 0.163 mmol). The crude was taken up in THF (3 mL) and treated with TBAF (0.65 mmol, 4.0 equiv, 1.0 M in THF). The reaction mixture was stirred at rt for 4 h, quenched with sat. aq.  $\text{NH}_4\text{Cl}$  (5 mL), followed by addition of d.i.  $\text{H}_2\text{O}$  (5 mL). The organic layer was collected and the aqueous layer was extracted with  $\text{Et}_2\text{O}$  (2 x 10 mL). The combined organic layers were washed with brine, dried with  $\text{MgSO}_4$ , and concentrated *in vacuo*. The product was purified by chromatography on  $\text{SiO}_2$  (20 %  $\text{Et}_2\text{O}$ / hexanes) to afford **10e** (22.0 mg, 0.117 mmol, 72%) as a colorless oil. Analytical data matches that which has been previously reported for **10e**:<sup>9</sup>  $^1\text{H}$  NMR (500 MHz,  $\text{CDCl}_3$ )  $\delta$  7.31 - 7.26 (m, 2 H), 7.22 - 7.16 (m, 3 H), 6.22 (dd,  $J = 10.5, 15.1$  Hz, 1 H), 6.09 (dd,  $J = 10.5, 15.1$  Hz, 1 H), 5.79 - 5.70 (m, 2 H), 4.17 (d,  $J = 3.8$  Hz, 2 H), 2.71 (t,  $J = 7.8$  Hz, 2 H), 2.42 (q,  $J = 7.4$  Hz, 2 H), 1.30 (bs, 1 H);  $^{13}\text{C}$  NMR (125 MHz,  $\text{CDCl}_3$ )  $\delta$  141.8, 134.6, 132.0, 130.1, 130.0, 128.6, 128.5, 126.0, 63.7, 35.8, 34.6.

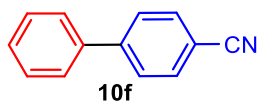

**4-Cyanobiphenyl:** Following general procedure, using PSTA-II (660 mg, 0.488 mmol), **8** (214  $\mu$ L, 1.9 M, 0.407 mmol), PdCl<sub>2</sub> (0.9 mg, 4.9  $\mu$ mol), dpca (2.4 mg, 6.5  $\mu$ mol), CuI (3.1 mg, 16.3  $\mu$ mol) and **9c** (37.3 mg, 0.163 mmol). The product was purified by chromatography on SiO<sub>2</sub> (2% Et<sub>2</sub>O/ hexanes) to afford **10f** (26.8 mg, 0.150 mmol, 92%) as a colorless solid. Analytical data matches that which has been previously reported for **10f**:<sup>10</sup> <sup>1</sup>H NMR (500 MHz, CDCl<sub>3</sub>)  $\delta$  7.73 (d,  $J$  = 8.3 Hz, 2 H), 7.69 (d,  $J$  = 8.4 Hz, 2 H), 7.59 (d,  $J$  = 7.4 Hz, 2 H), 7.49 (t,  $J$  = 7.2 Hz, 2 H), 7.43 (t,  $J$  = 7.3 Hz, 1 H); <sup>13</sup>C NMR (125 MHz, CDCl<sub>3</sub>)  $\delta$  145.8, 139.3, 132.8, 129.3, 128.8, 127.9, 127.4, 119.1, 111.1.

Preparation of **10f** from **9e** was carried out in a similar fashion.

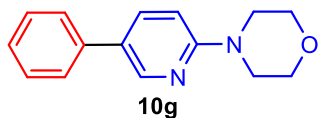

**4-(5-phenylpyridin-2-yl)morpholine:** Following general procedure, using PSTA-II (650 mg, 0.481 mmol), **8** (211  $\mu$ L, 1.9 M, 0.401 mmol), PdCl<sub>2</sub> (0.9 mg, 4.8  $\mu$ mol), dpca (2.4 mg, 6.4  $\mu$ mol), CuI (3.0 mg, 16.0  $\mu$ mol) and **9d** (46.4 mg, 0.160 mmol). The product was purified by chromatography on SiO<sub>2</sub> (20% Et<sub>2</sub>O/ hexanes) to afford **10g** (34.9 mg, 0.145 mmol, 91%) as a colorless solid. Analytical data matches that which has been previously reported for **10g**:<sup>11</sup> <sup>1</sup>H NMR (500 MHz, CDCl<sub>3</sub>)  $\delta$  8.47 (d,  $J$  = 2.2 Hz, 1 H), 7.75 (dd,  $J$  = 2.5, 8.8 Hz, 1 H), 7.53 (d,  $J$  = 7.4 Hz, 2 H), 7.43 (t,  $J$  = 7.5 Hz, 2 H), 7.32 (t,  $J$  = 7.4 Hz, 1 H), 6.71 (d,  $J$  = 8.8 Hz, 1 H), 3.85 (app t,  $J$  = 4.9 Hz, 4 H), 3.56 (app t,  $J$  = 4.9 Hz, 4 H); <sup>13</sup>C NMR (125 MHz, CDCl<sub>3</sub>)  $\delta$  158.9, 146.3, 138.4, 136.3, 129.1, 127.0, 126.9, 126.4, 106.8, 66.9, 45.8.

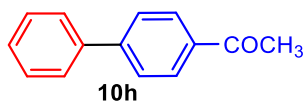

**4-Acetylbiphenyl:** Following general procedure, using PSTA-II (620 mg, 0.459 mmol), **8** (201  $\mu$ L, 1.9 M, 0.382 mmol), PdCl<sub>2</sub> (0.8 mg, 4.6  $\mu$ mol), dpca (2.3 mg, 6.1  $\mu$ mol), CuI (2.9 mg, 15.3  $\mu$ mol) and **9f** (36.5 mg, 0.148 mmol). The product was purified by chromatography on SiO<sub>2</sub> (5% Et<sub>2</sub>O/ hexanes) to afford **10h** (23.8 mg, 0.121 mmol, 82%) as a colorless solid. Analytical data matches that which has been previously reported for **10h**:<sup>12</sup> **<sup>1</sup>H NMR** (500 MHz, CDCl<sub>3</sub>)  $\delta$  8.04 (d,  $J$  = 8.3 Hz, 2 H), 7.69 (d,  $J$  = 8.1 Hz, 2 H), 7.63 (d,  $J$  = 7.3 Hz, 2 H), 7.48 (t,  $J$  = 7.5 Hz, 2 H), 7.41 (t,  $J$  = 7.3 Hz, 1 H), 2.64 (s, 3 H); **<sup>13</sup>C NMR** (125 MHz, CDCl<sub>3</sub>)  $\delta$  197.9, 145.9, 140.0, 136.0, 129.1, 129.0, 128.4, 127.4, 127.4, 26.8.

Preparation of **10h** from **9g** was carried out in a similar fashion.

## References

1. Toy, P. H.; Reger, T. S.; Garibay, P.; Garno, J. C.; Malikayil, J. A.; Liu, G.; Janda, K. D. *J. Comb. Chem.* **2001**, *3*, 117.
2. Stille, J. K.; Simpson, J. H. *J. Am. Chem. Soc.* **1987**, *109*, 2138.
3. Huang, Z.; Negishi, E.; *Org. Lett.* **2006**, *8*, 3675.
4. Kofron, W. G.; Baclawski, L. M. *J. Org. Chem.* **1976**, *41*, 1879.
5. Zhang, L.; Qing, J.; Yang, P.; Wu, J. *Org. Lett.* **2008**, *10*, 4971.
6. Manolikakes, G.; Knochel, P. *Angew. Chem. Int. Ed.* **2009**, *48*, 205.
7. Satoh, T.; Hanaki, N.; Yamada, N.; Asano, T. *Tetrahedron* **2000**, *56*, 6223
8. Denmark, S. E.; Sweis, R. F. *J. Am. Chem. Soc.* **2001**, *123*, 6439.
9. Nguyen, M. H., Smith, A. B. III. *Org. Lett.* **2013**, *15*, 4258.
10. Kobayashi, O.; Uraguchi, D.; Yamakawa, T. *Org. Lett.* **2009**, *11*, 2679.
11. Smith, A. B. III; Hoye, A. T.; Martinez-Solorio, D.; Kim, W.-S.; Tong, R. *J. Am. Chem. Soc.* **2012**, *134*, 4533.

12. Metallinos, C.; Zaifman, J.; Dodge, L. *Org. Lett.* **2008**, *10*, 3527.



2.673  
2.663  
2.657  
2.653  
2.645  
2.641  
2.635  
2.625  
2.388  
2.372  
2.357  
2.343  
2.327  
2.139  
2.132

5.095  
5.102  
5.111  
5.119  
5.126  
5.178  
5.186  
5.189  
5.198  
5.220  
5.223  
5.845  
5.858  
5.861  
5.865  
5.874  
5.879  
5.894  
5.899  
5.908  
5.913  
5.915  
5.928  
7.117  
7.120  
7.132  
7.135  
7.147  
7.151  
7.258  
7.327  
7.343  
7.357  
7.512  
7.528  
7.557  
7.561  
7.573  
7.576

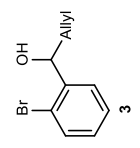

<sup>1</sup>H-NMR in CDCl<sub>3</sub> (500 MHz)

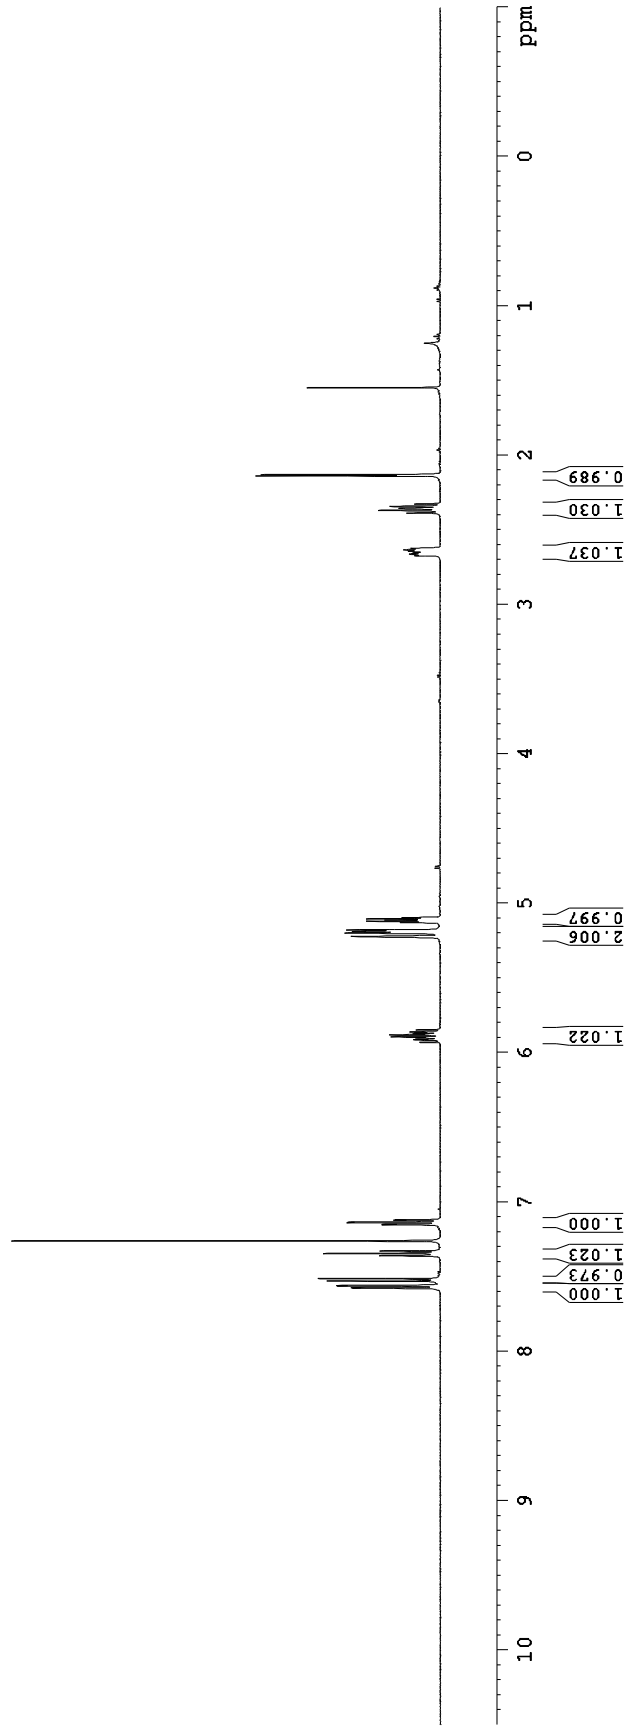

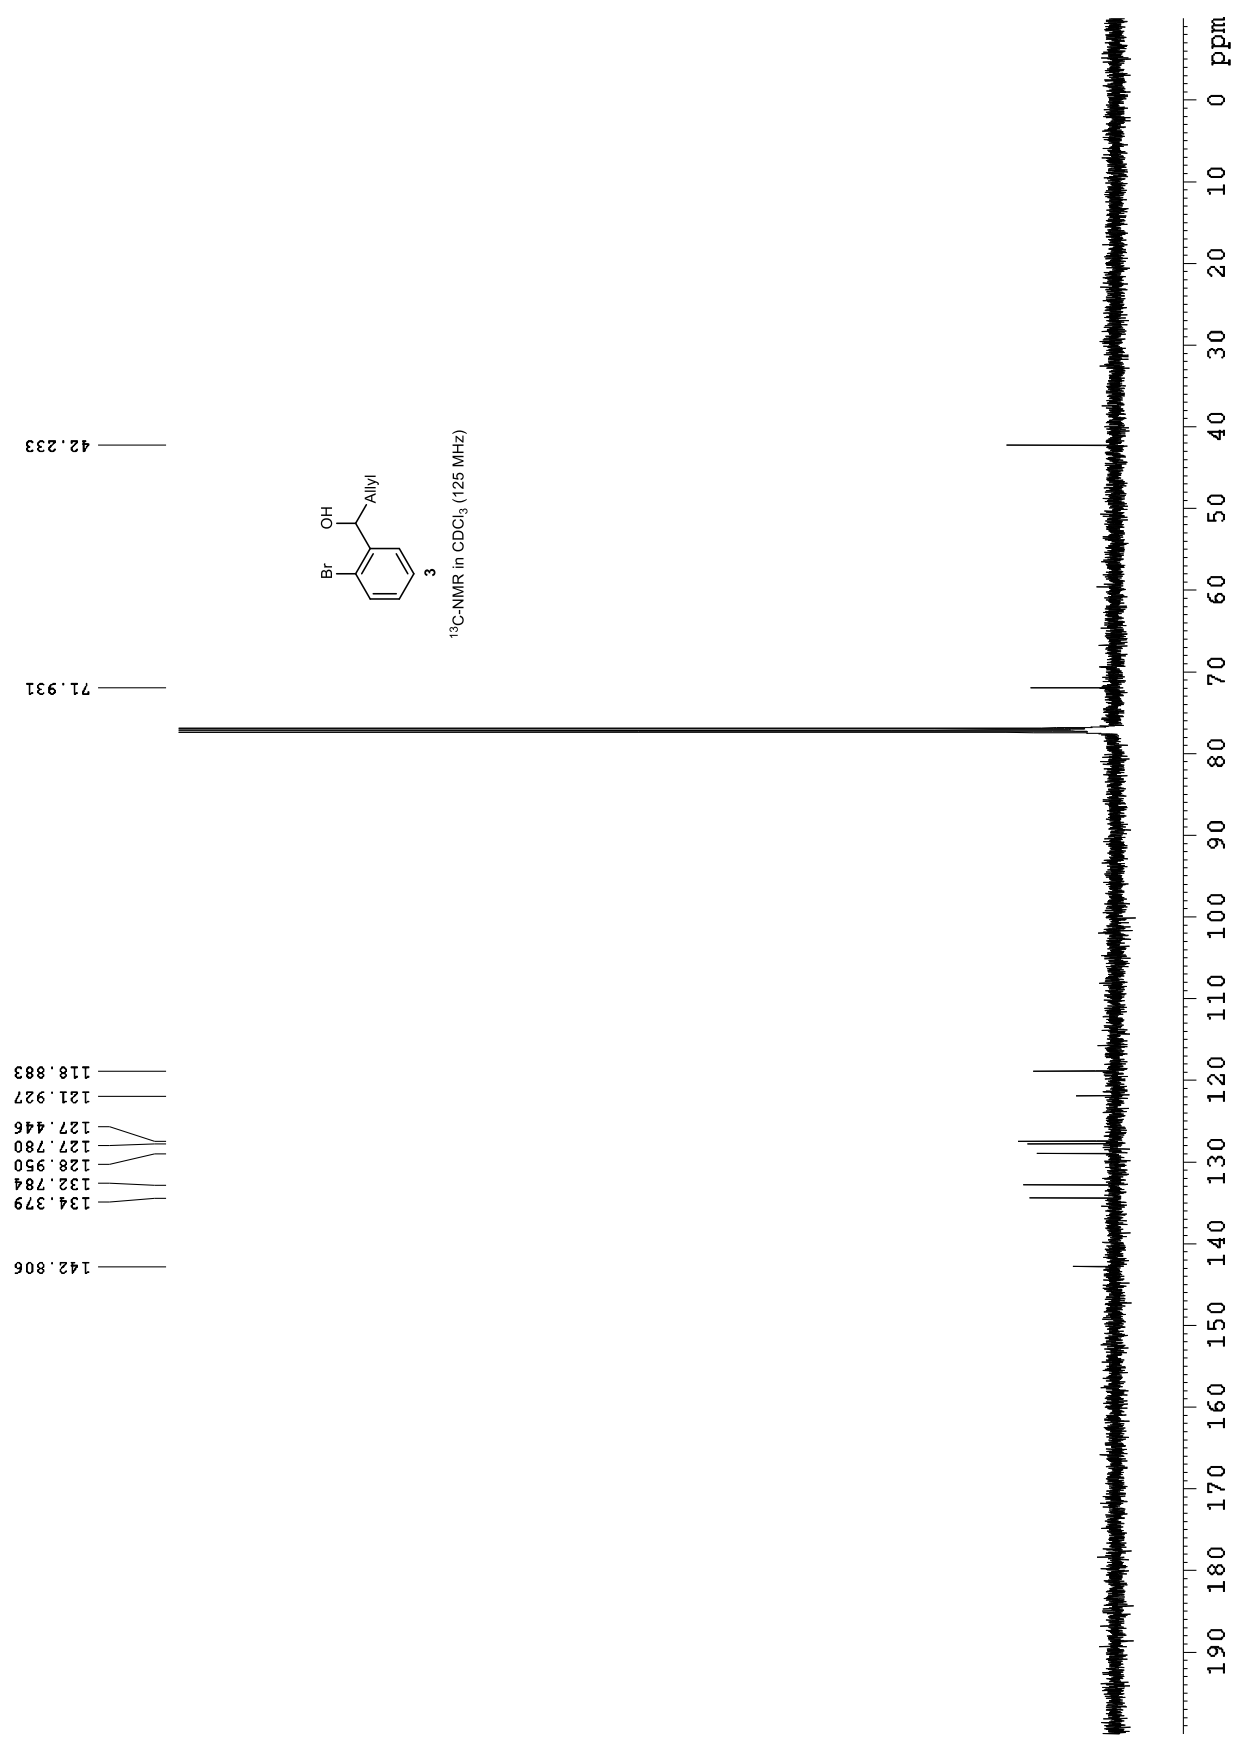

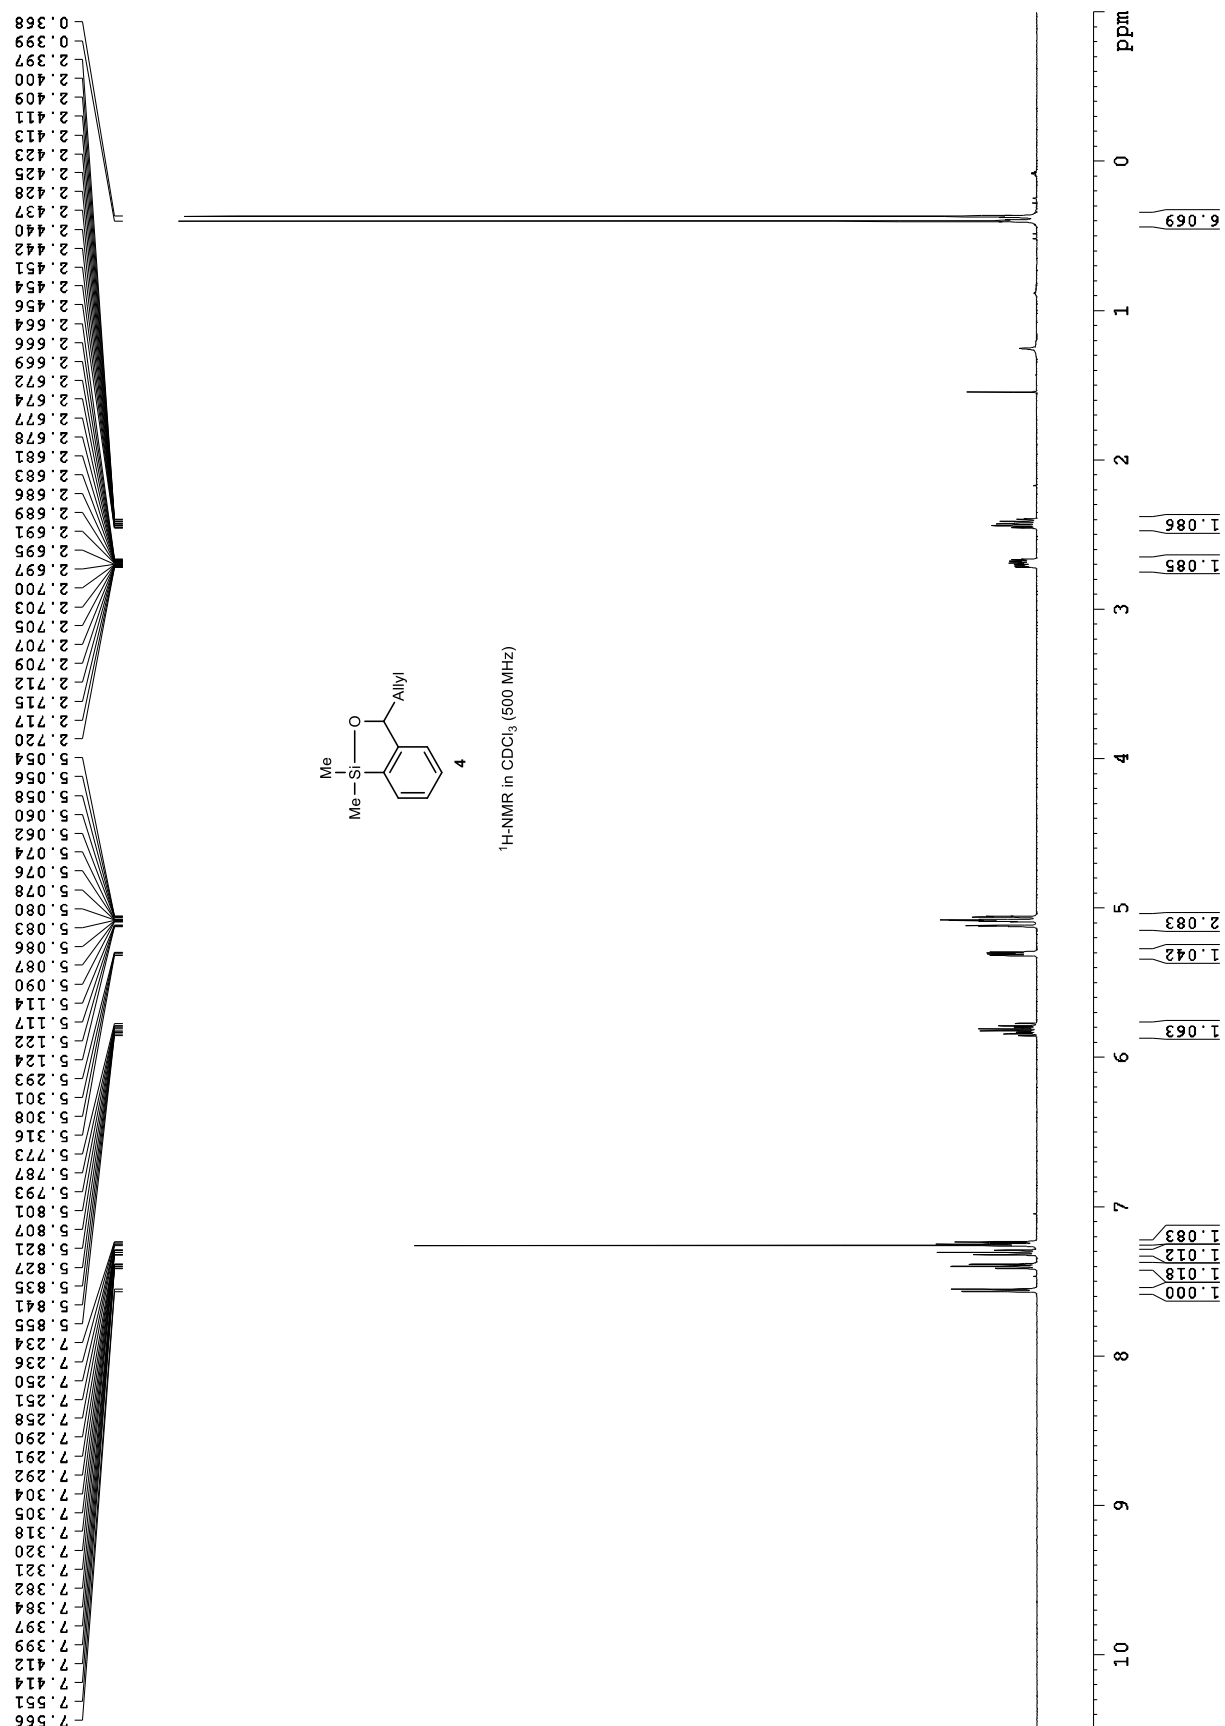

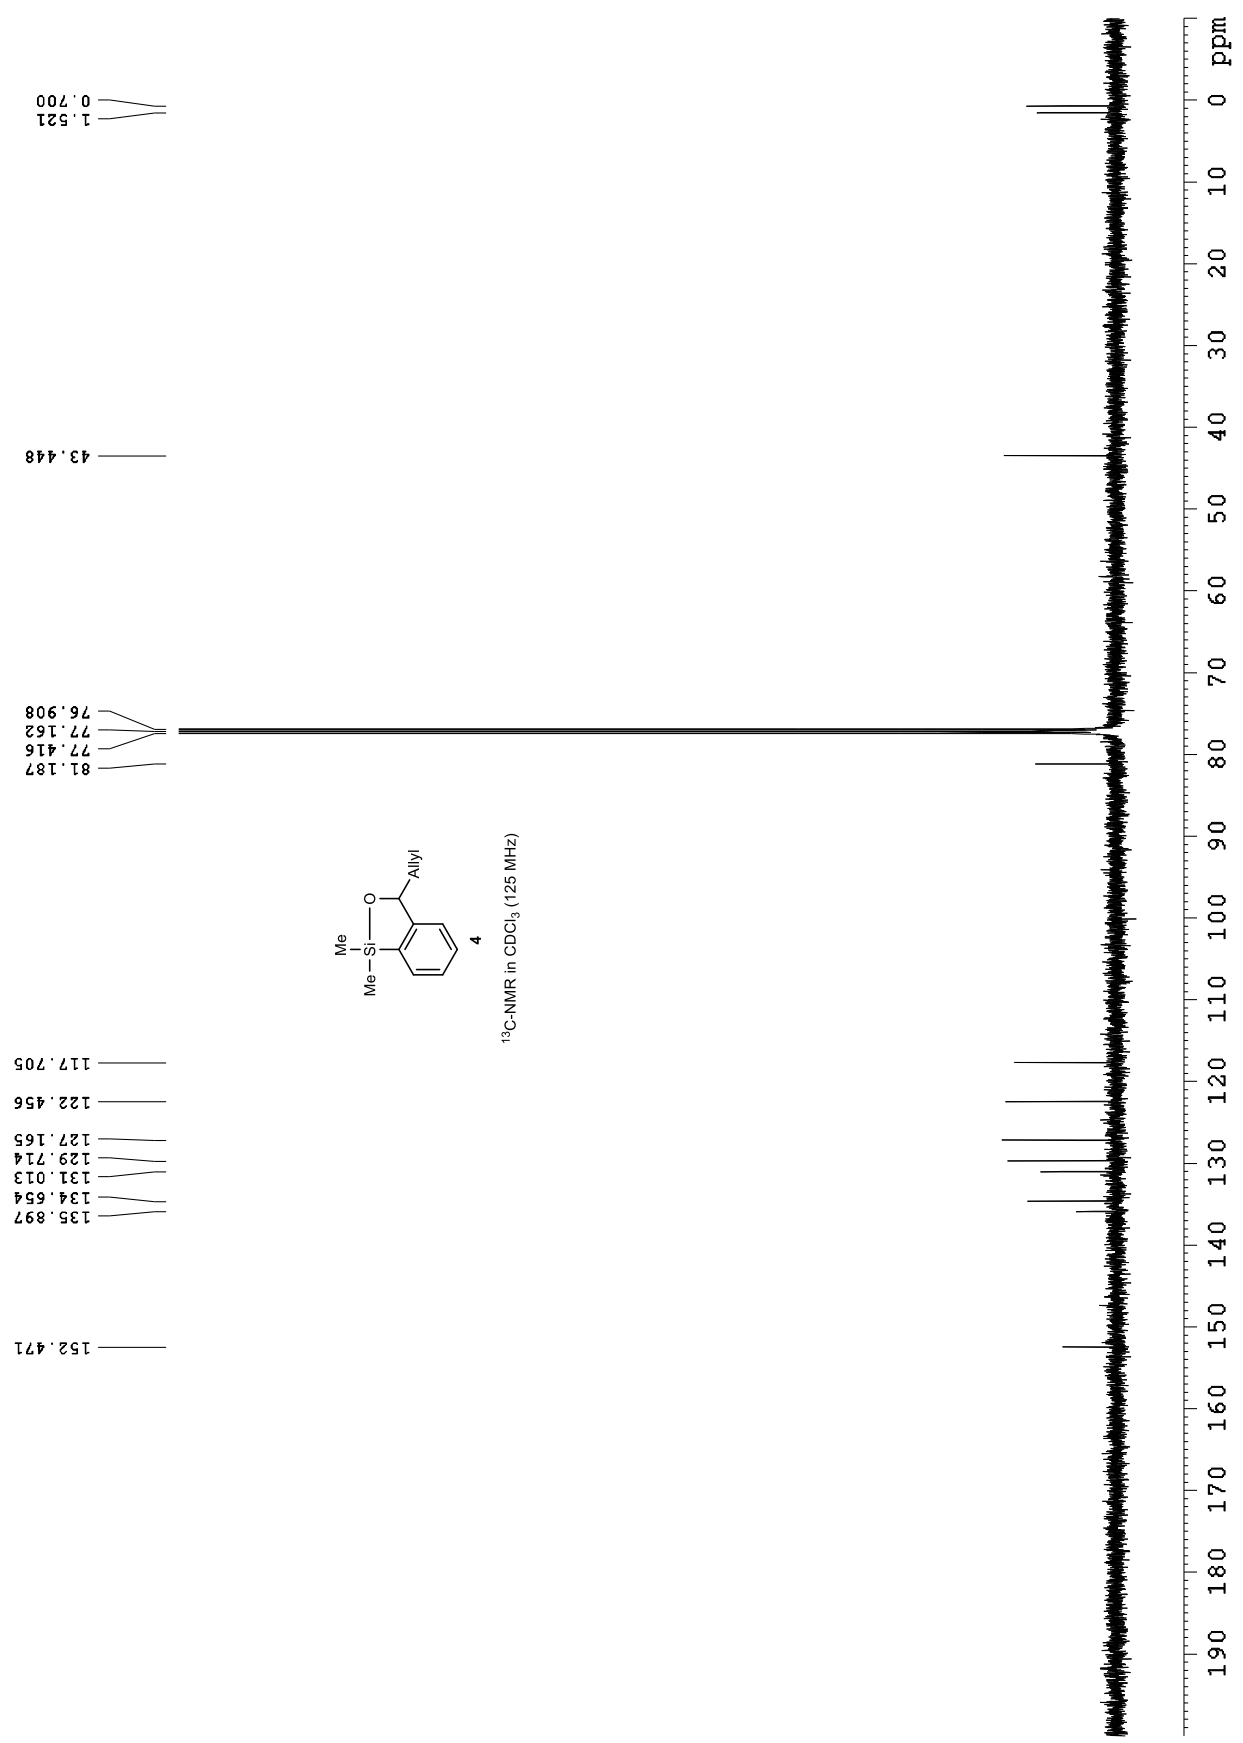

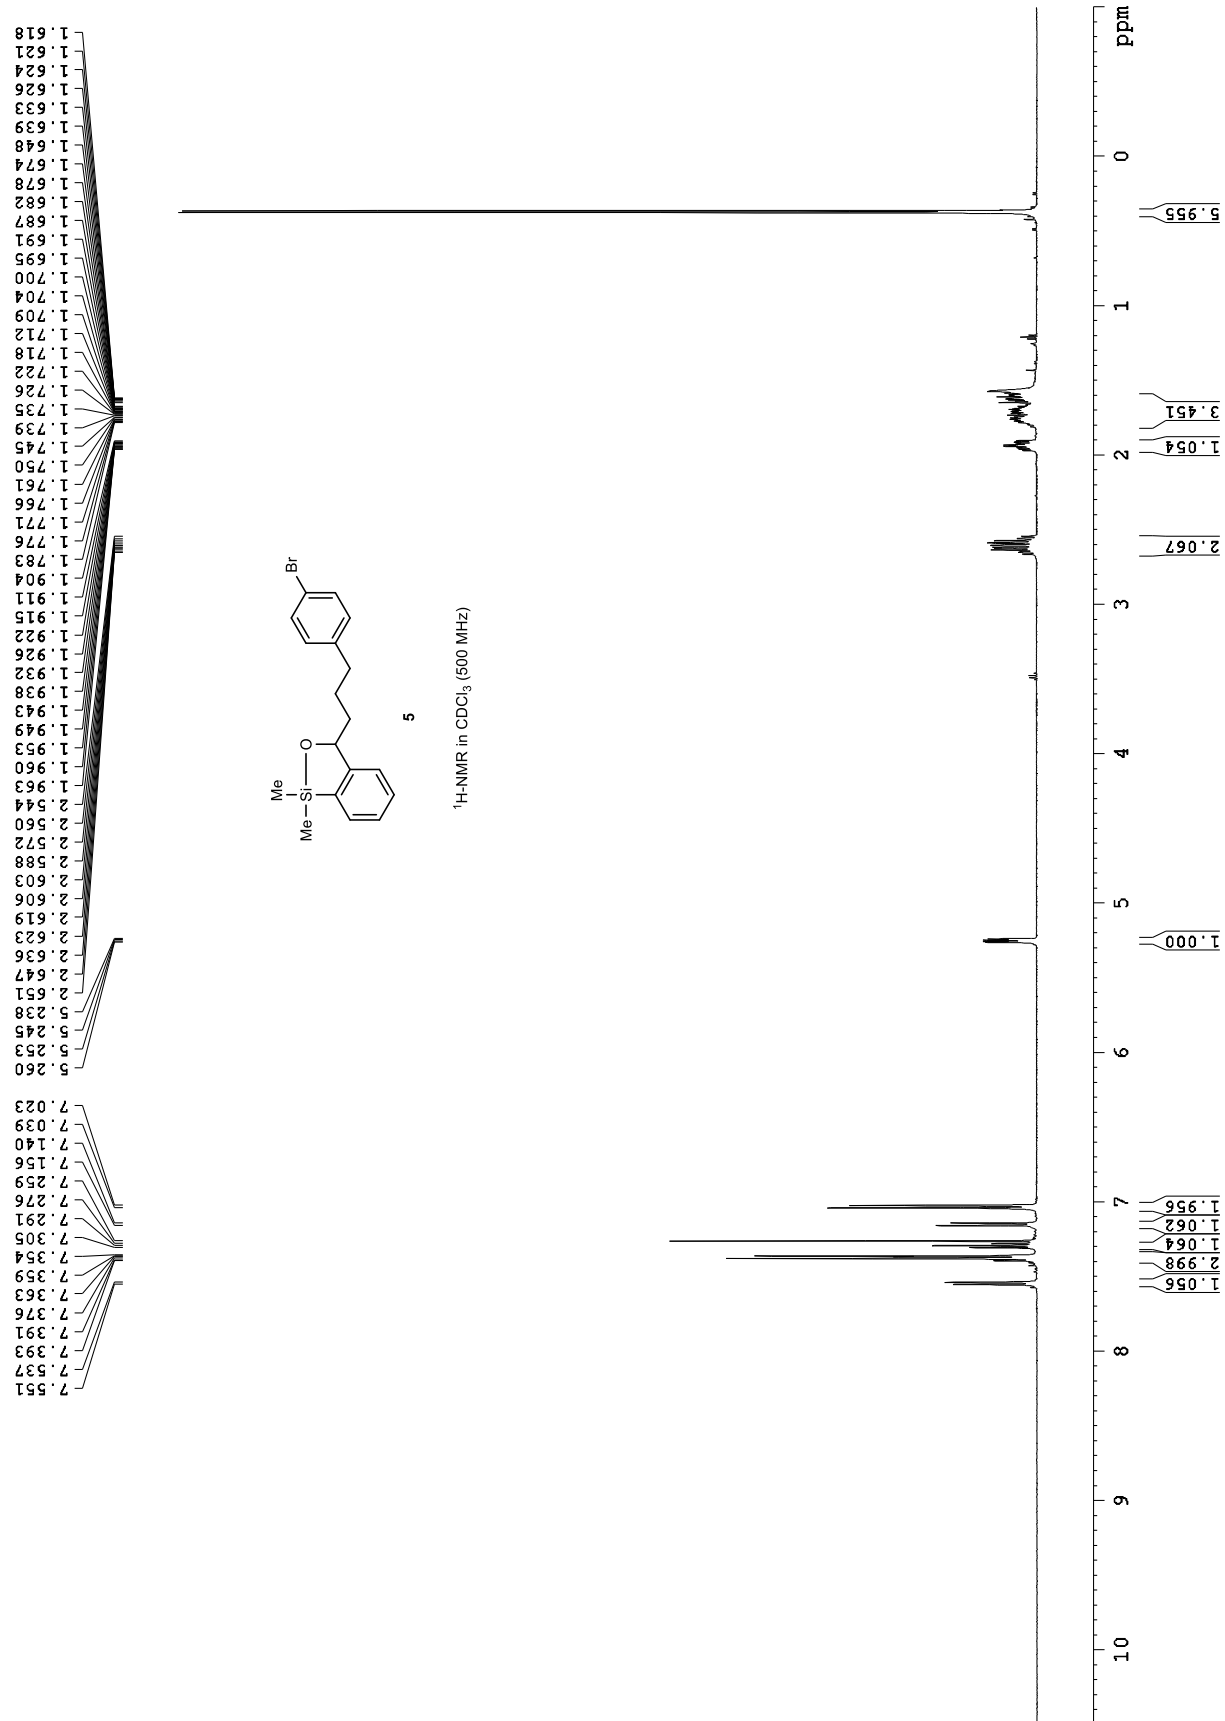

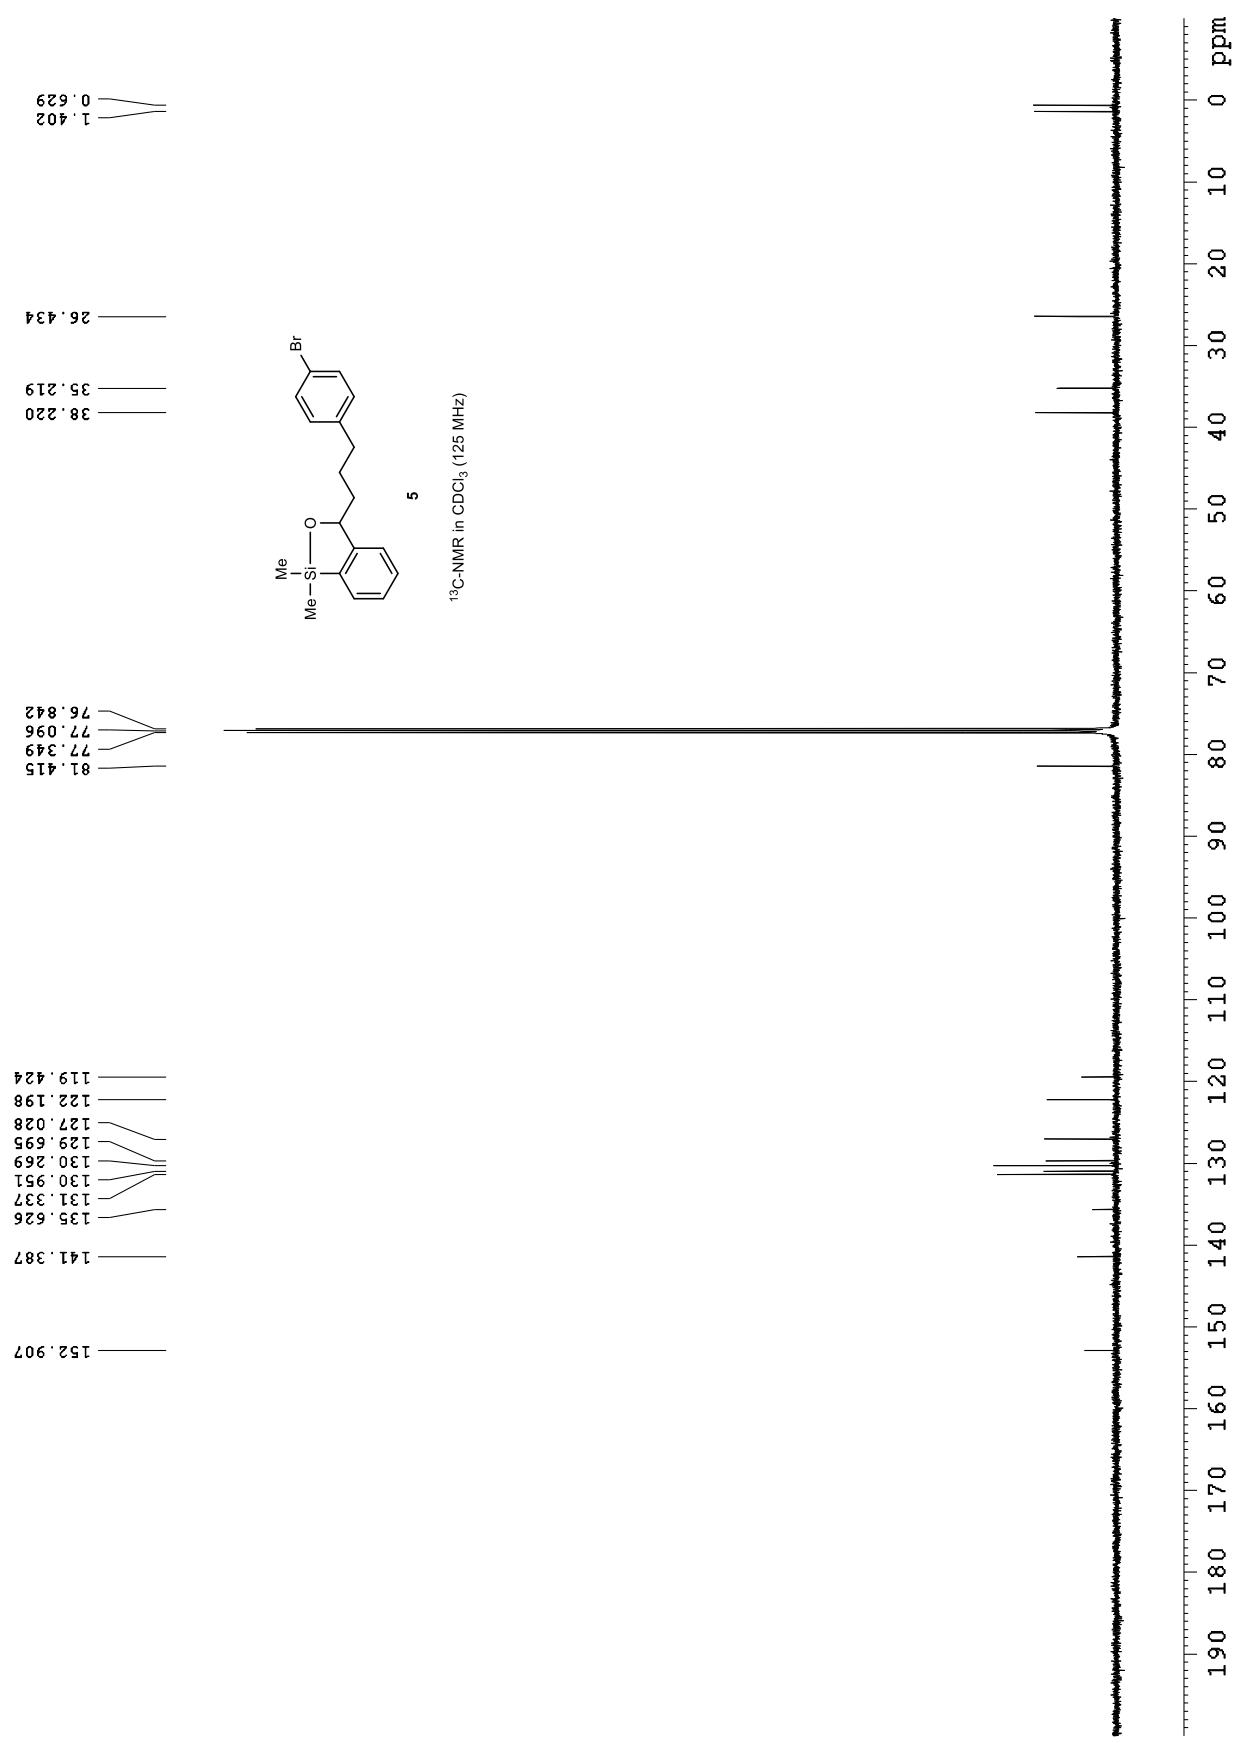

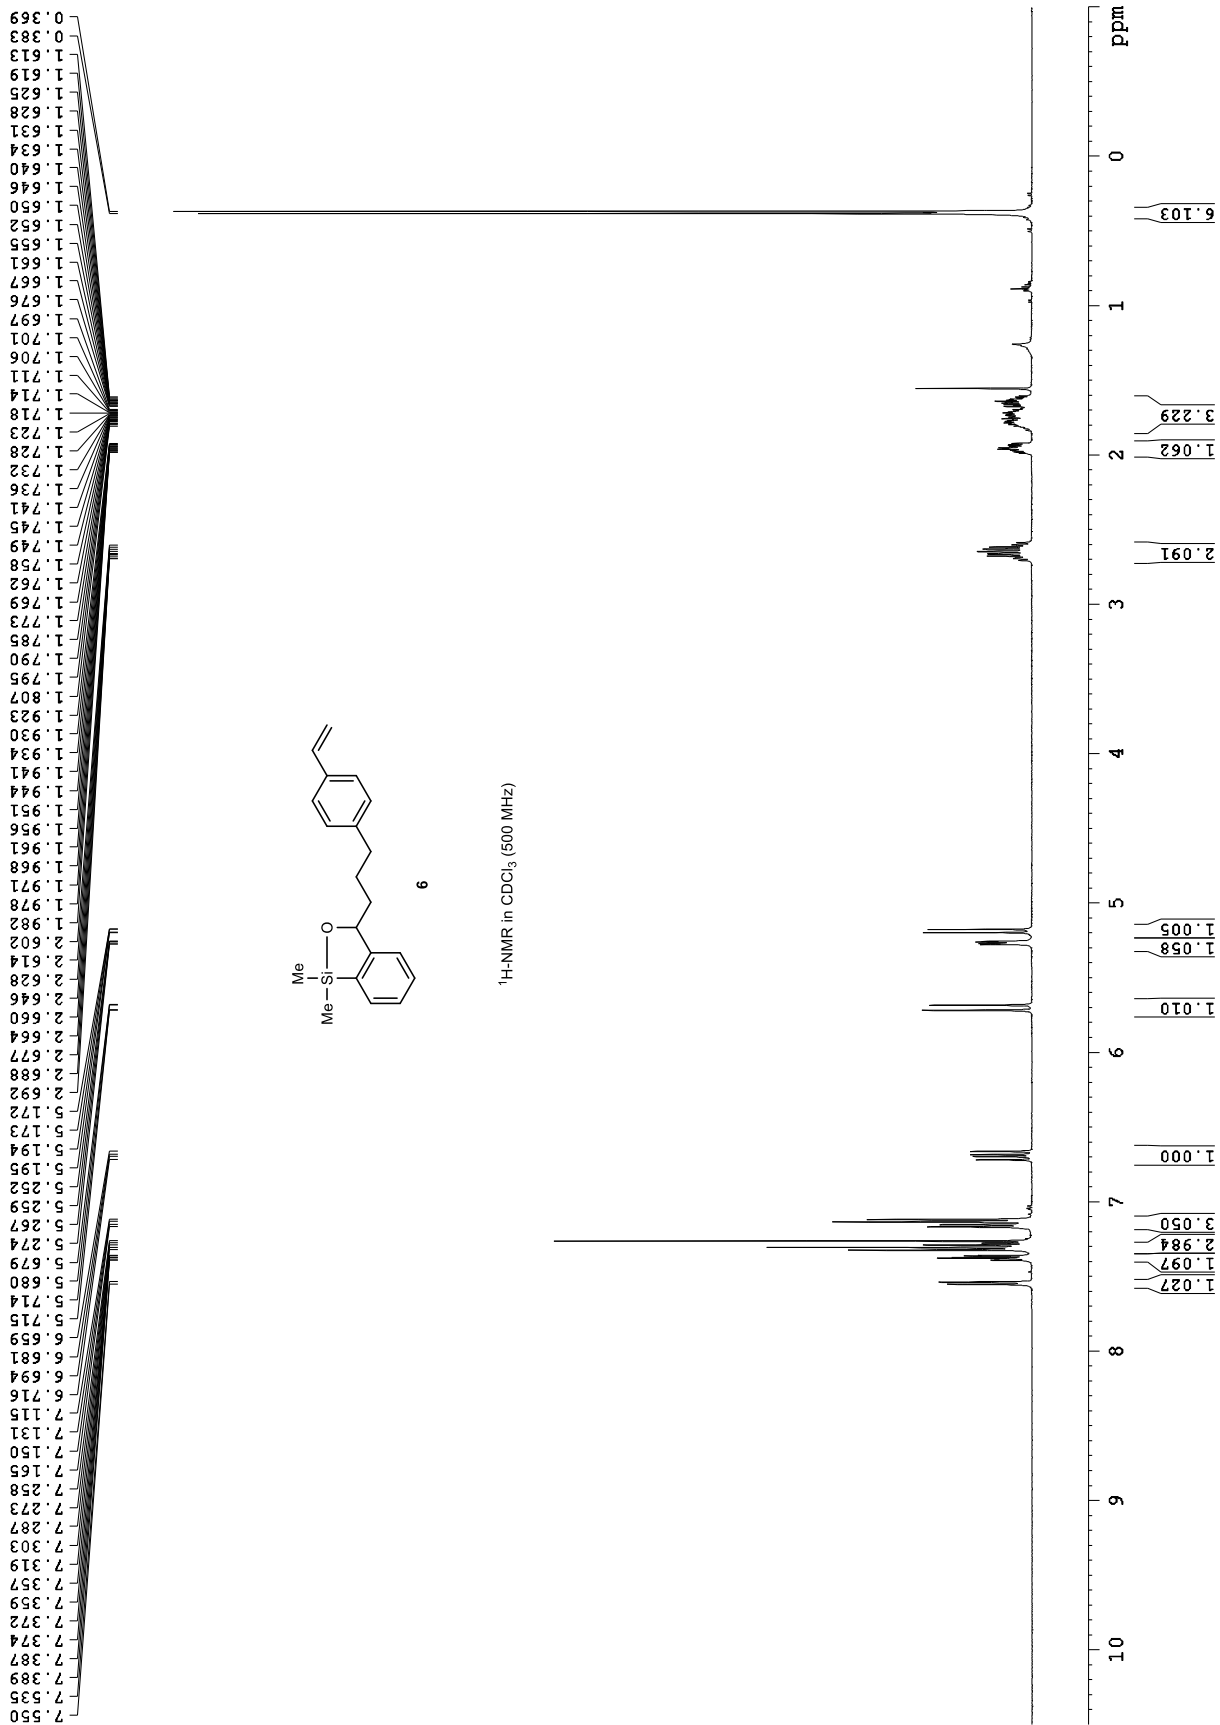

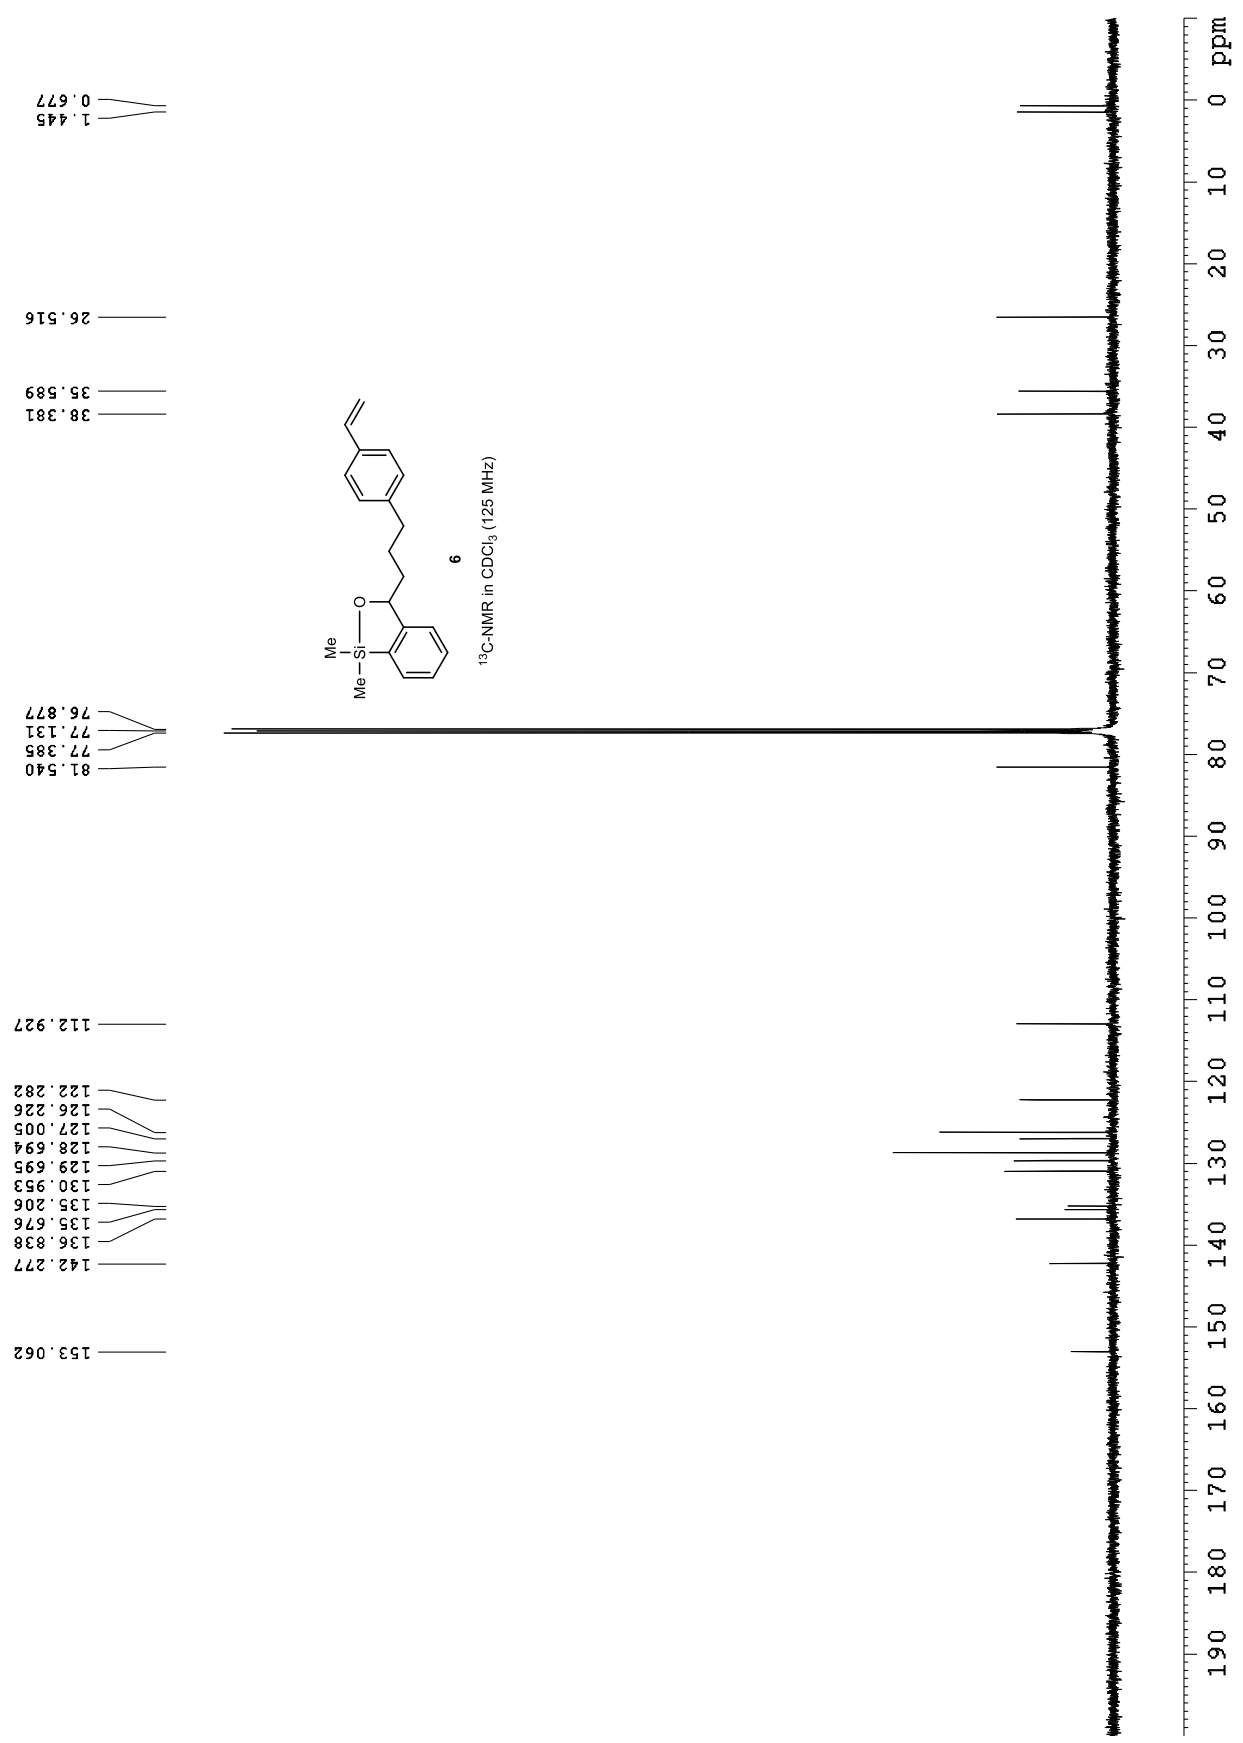



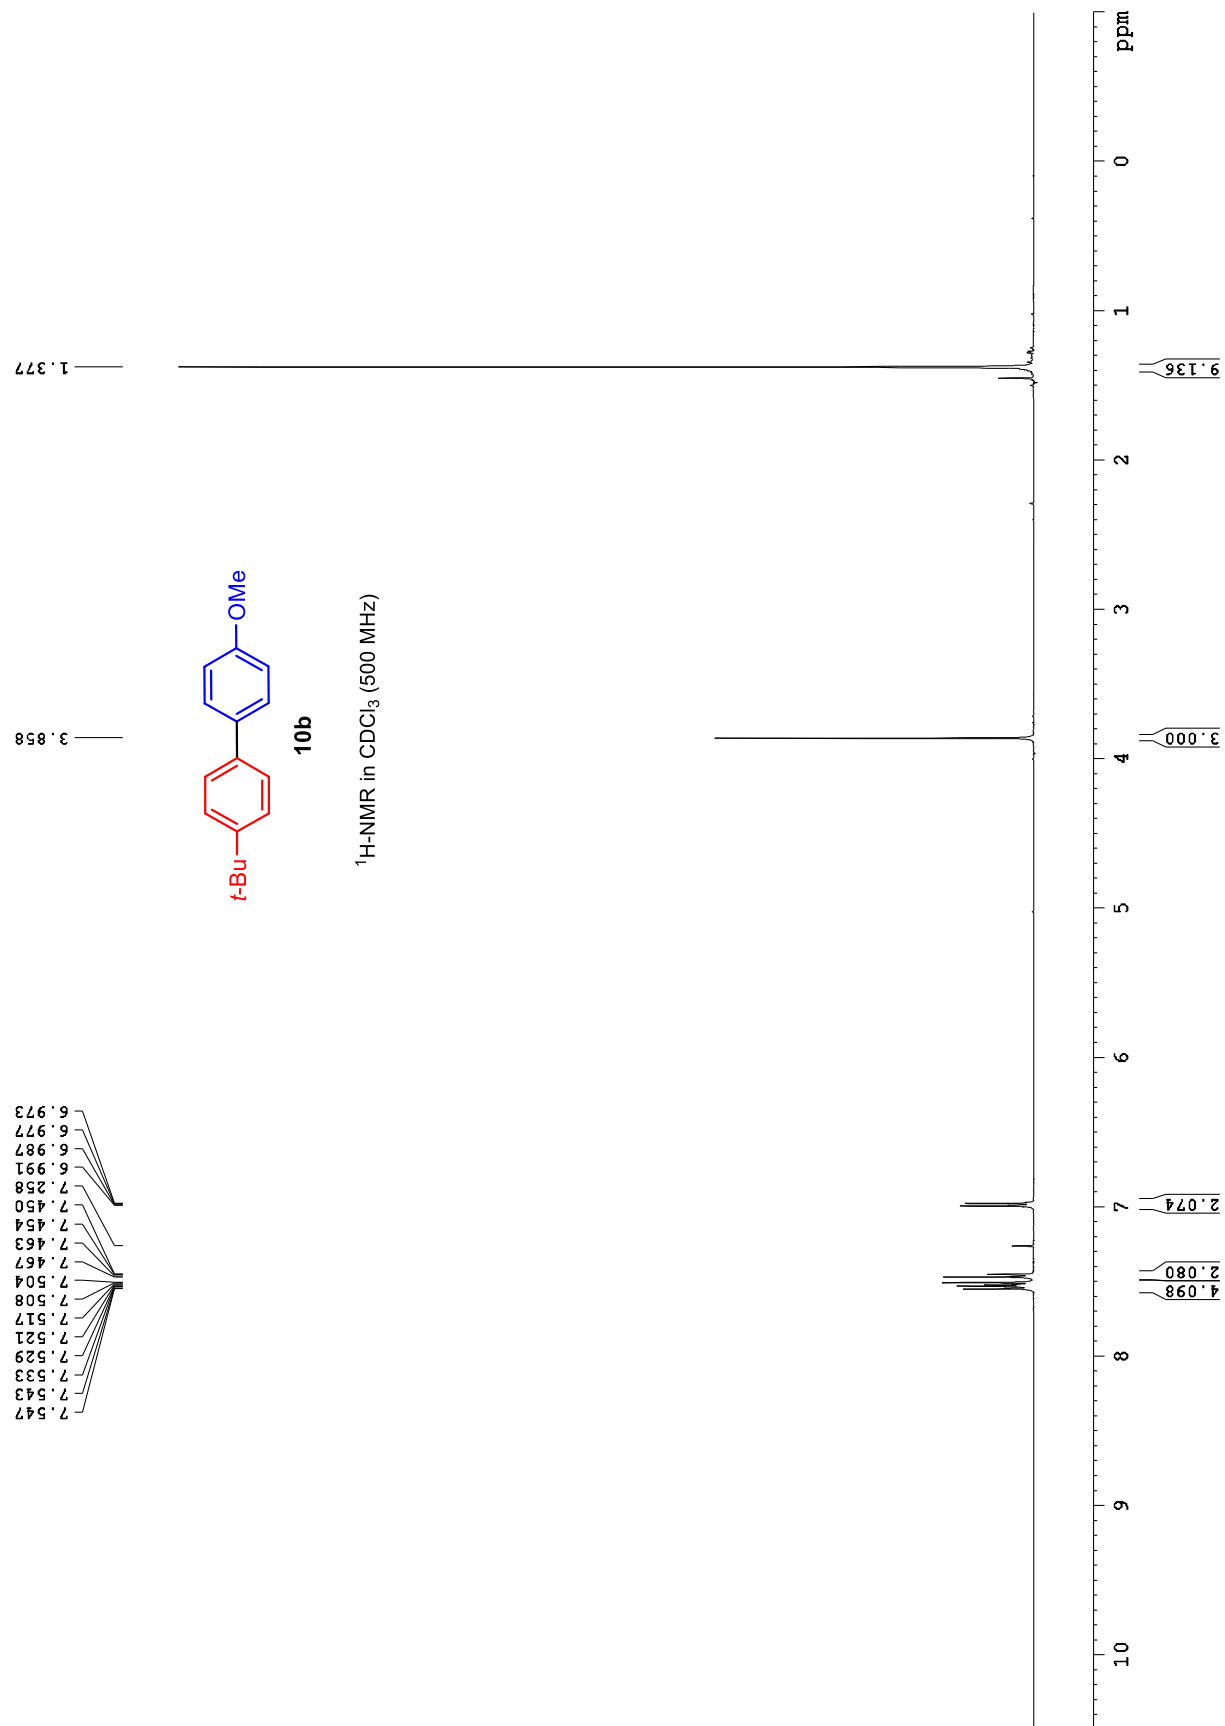

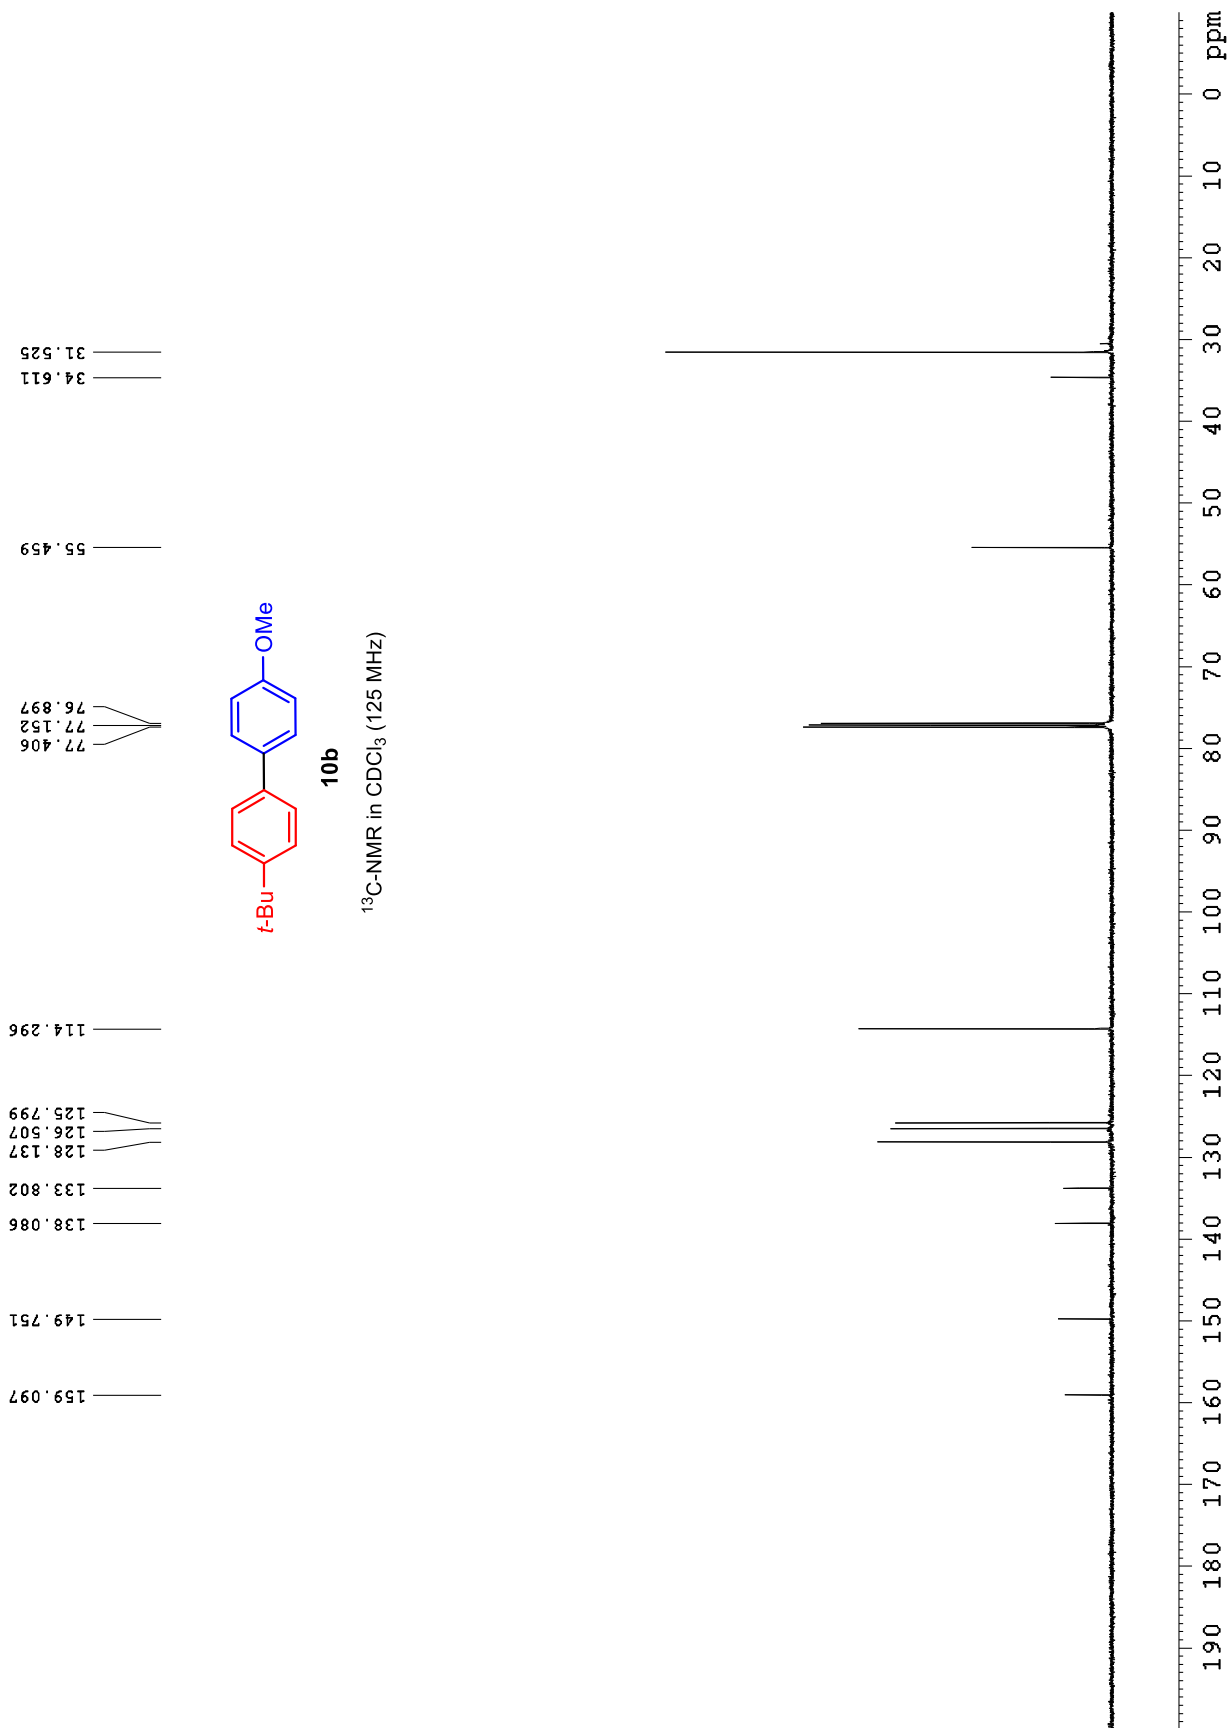

7.565  
7.563  
7.549  
7.547  
7.543  
7.539  
7.530  
7.526  
7.433  
7.418  
7.402  
7.320  
7.305  
7.290  
7.258  
6.999  
6.993  
6.989  
6.979  
6.976

3.857

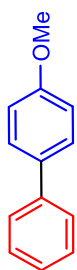

10

<sup>1</sup>H-NMR in CDCl<sub>3</sub> (500 MHz)

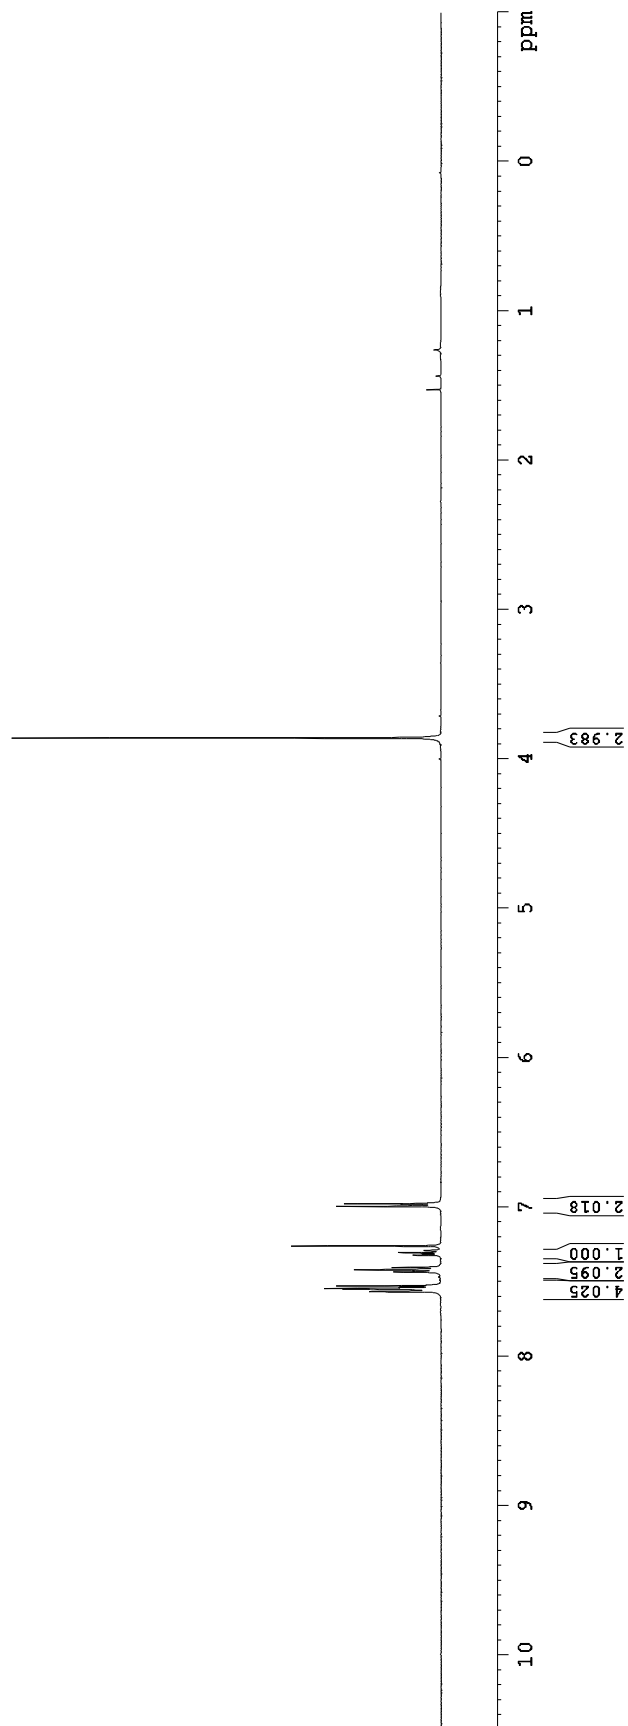

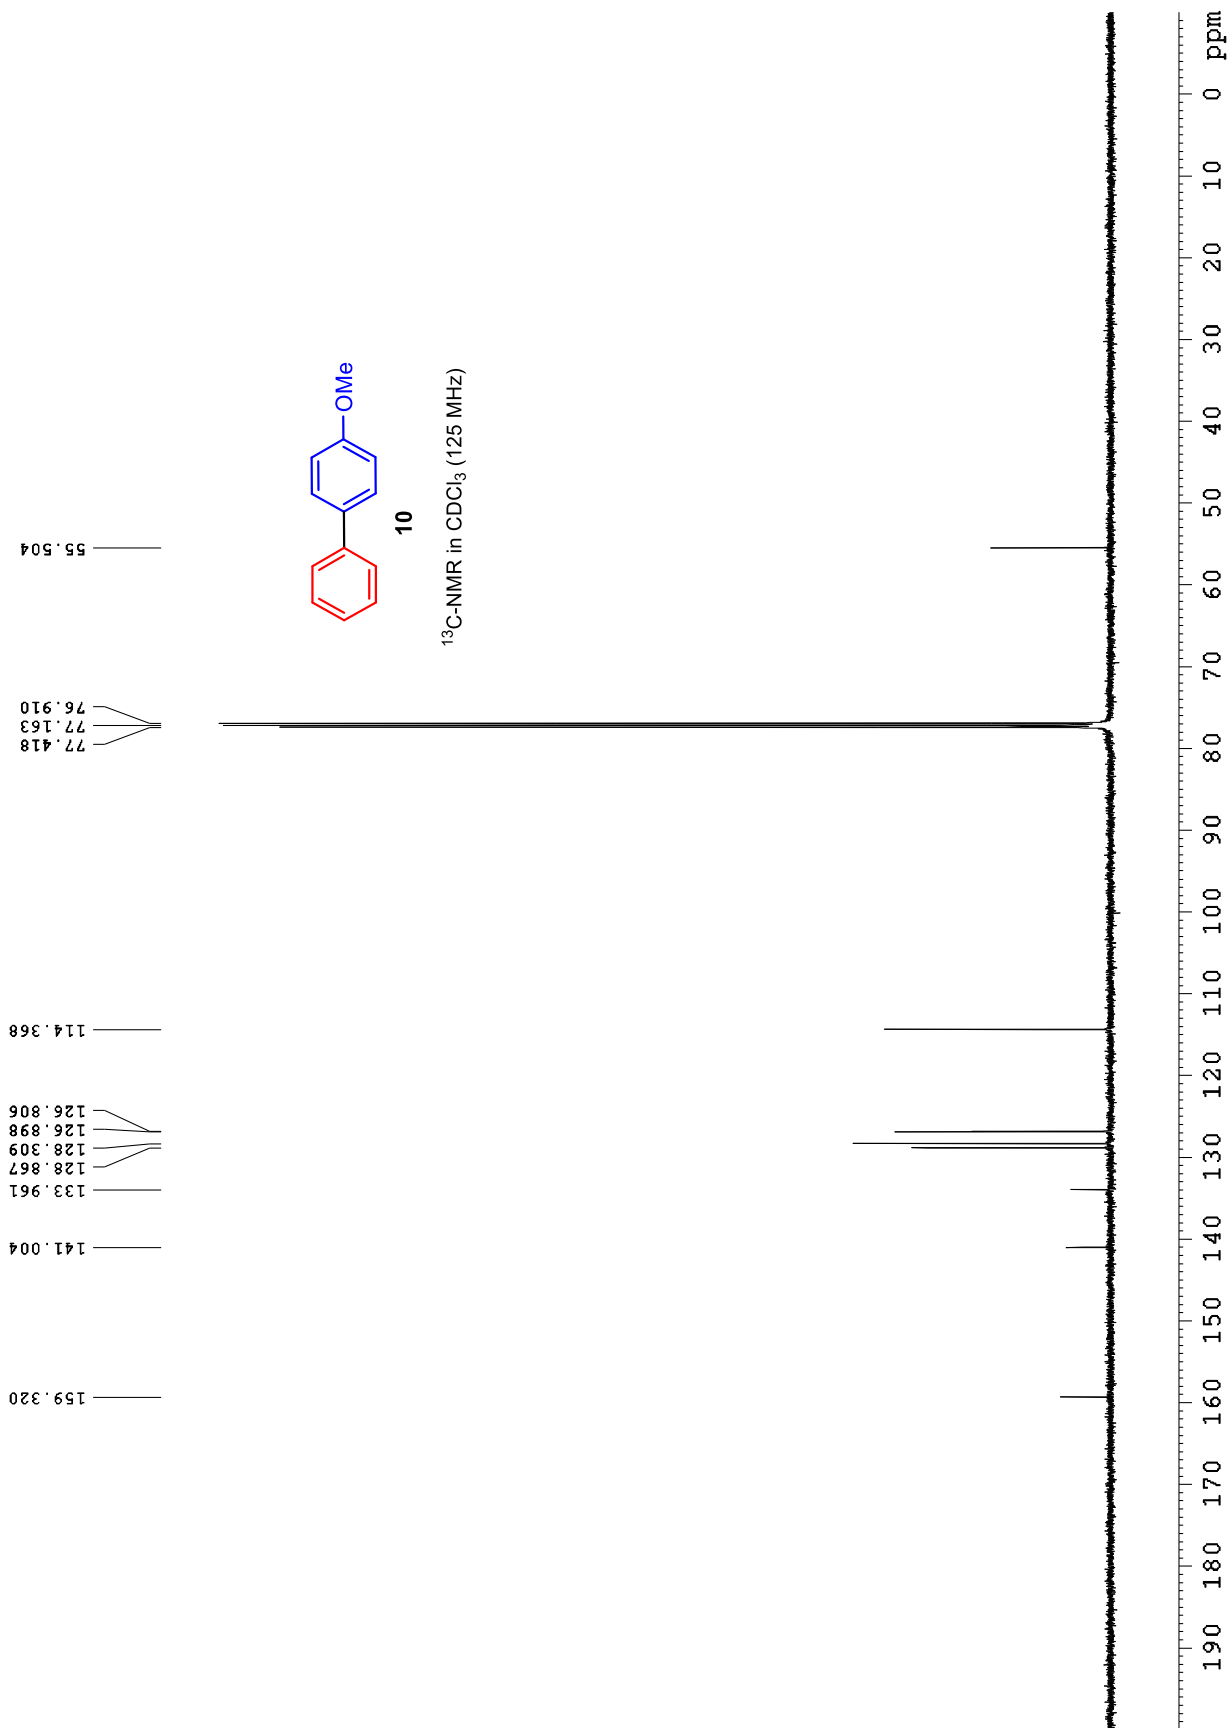

2.796  
2.781  
2.764  
2.533  
2.531  
2.517  
2.502  
2.488  
2.486

3.815  
3.801

7.308  
7.305  
7.293  
7.282  
7.278  
7.271  
7.268  
7.258  
7.254  
7.248  
7.226  
7.222  
7.212  
7.195  
7.180  
6.849  
6.843  
6.839  
6.830  
6.825  
6.820  
6.377  
6.345  
6.146  
6.132  
6.118  
6.114  
6.100  
6.087

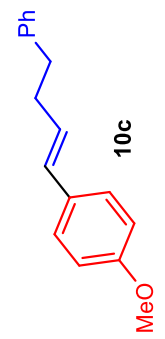

<sup>1</sup>H-NMR in CDCl<sub>3</sub> (500 MHz)

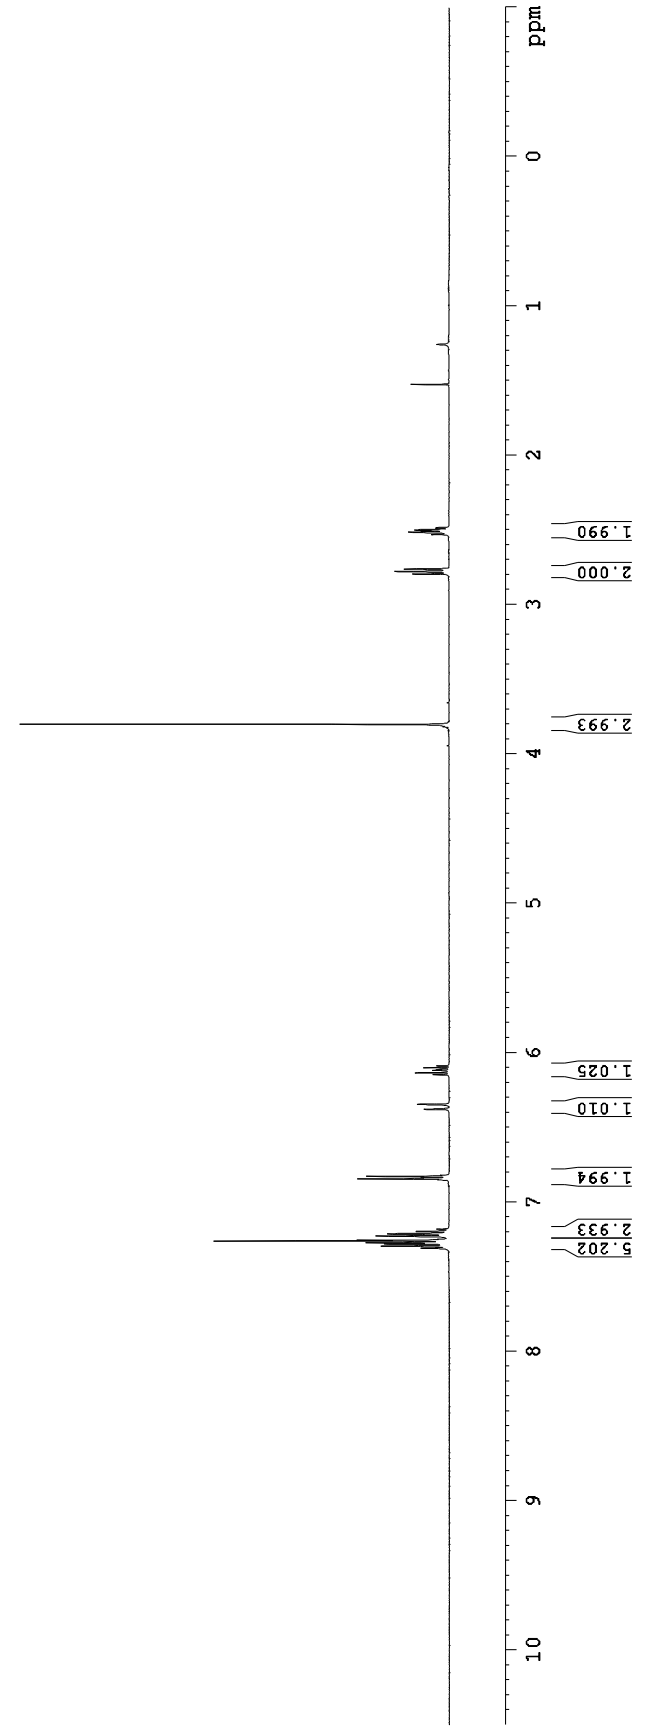

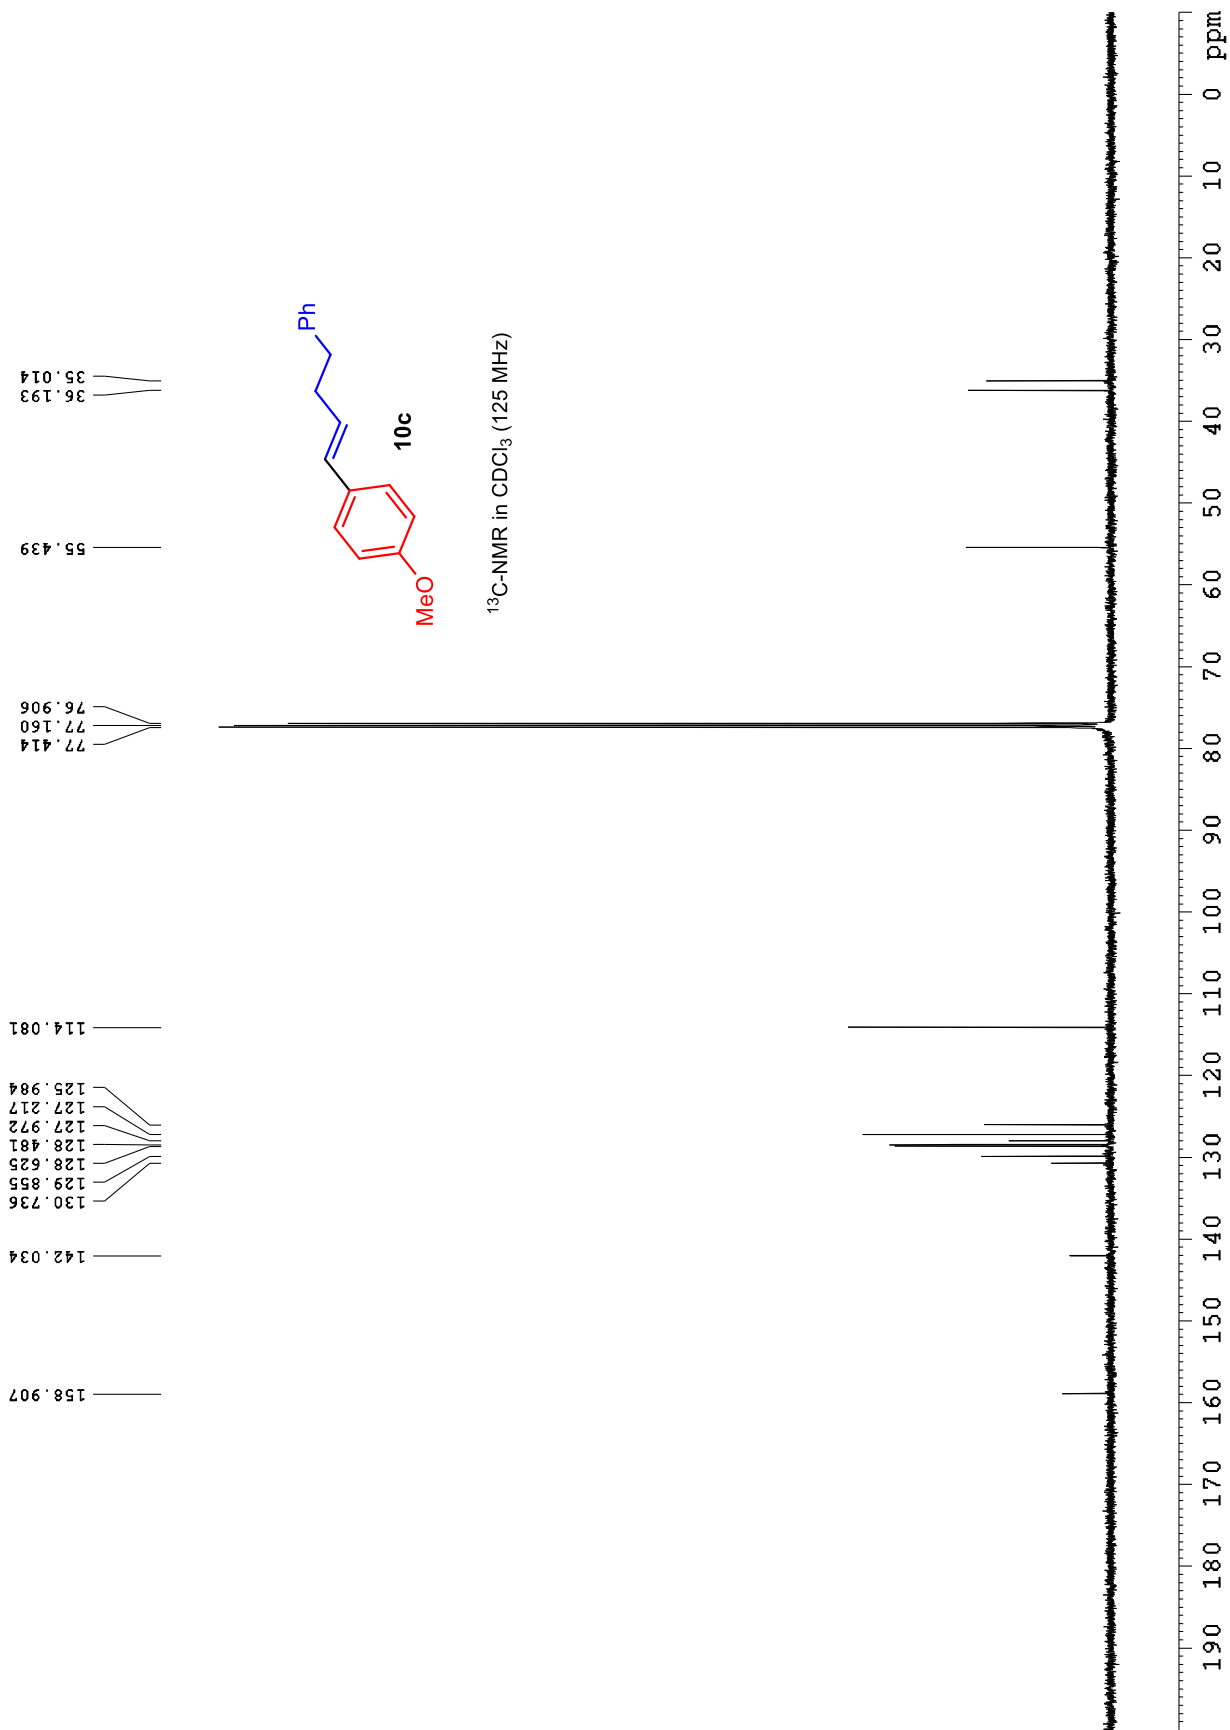

2.203  
2.200  
2.187  
2.173  
2.160  
2.157  
1.473  
1.459  
1.444  
1.438  
1.353  
1.341  
1.334  
1.326  
1.320  
1.312  
0.917  
0.904  
0.890

3.801

7.286  
7.268  
7.262  
7.258  
6.851  
6.846  
6.832  
6.828  
6.823  
6.336  
6.305  
6.117  
6.103  
6.090  
6.086  
6.072  
6.058

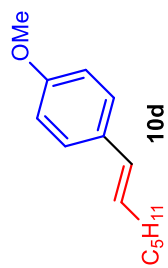

<sup>1</sup>H-NMR in CDCl<sub>3</sub> (500 MHz)

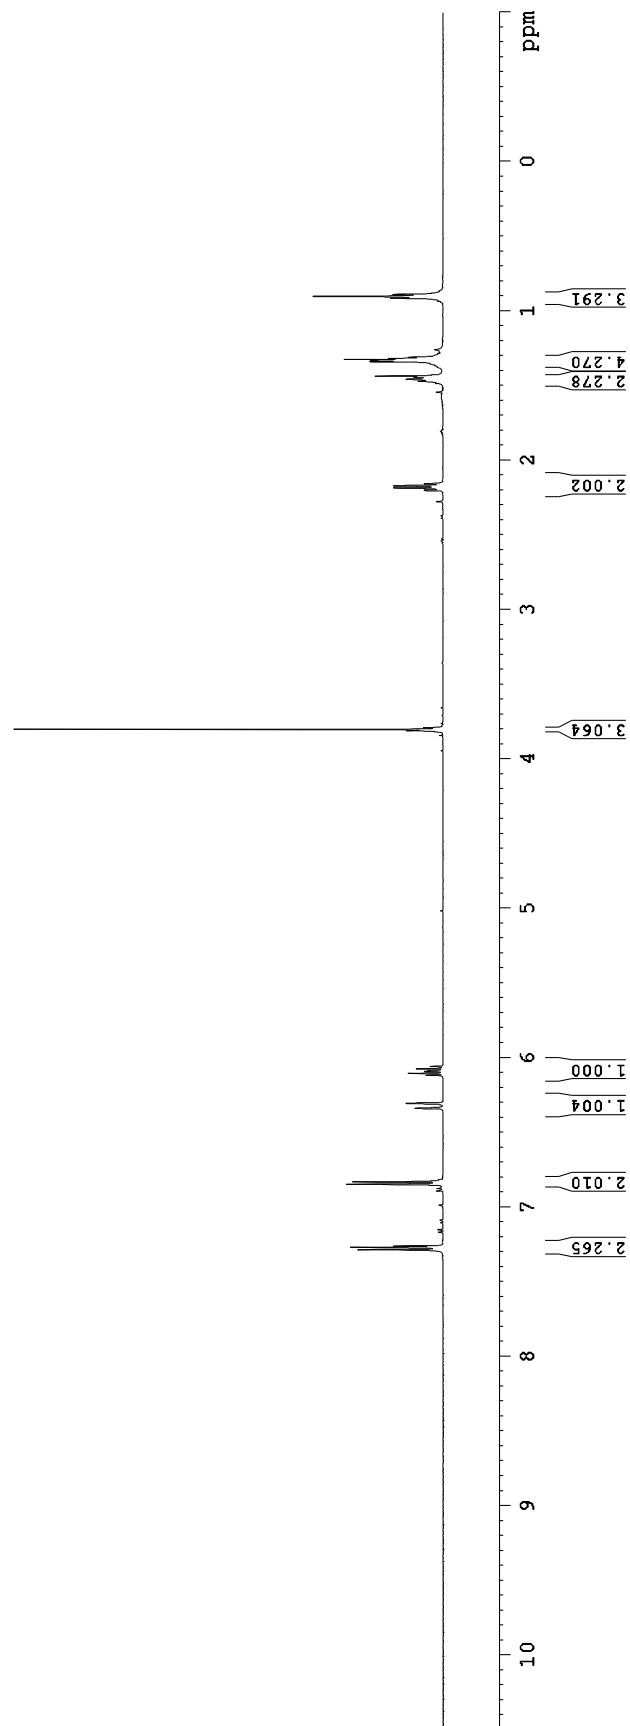

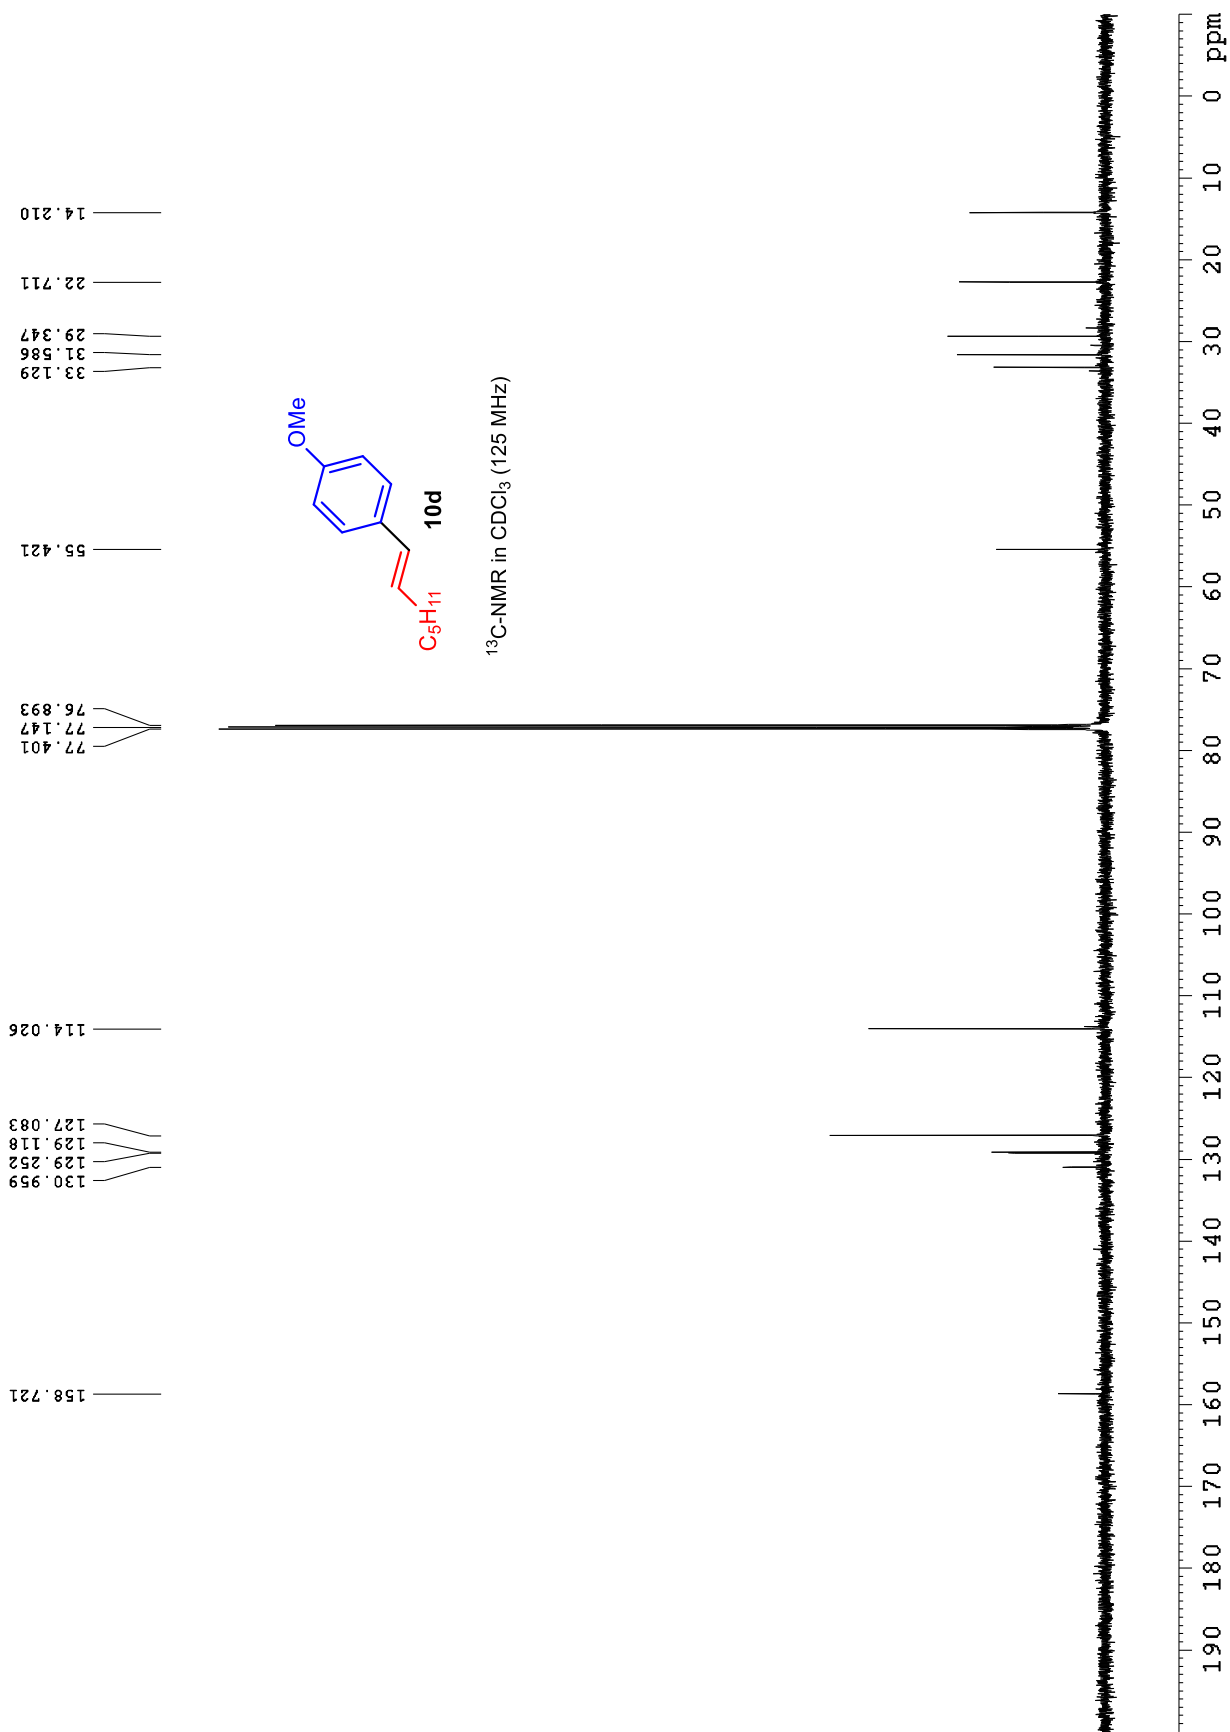



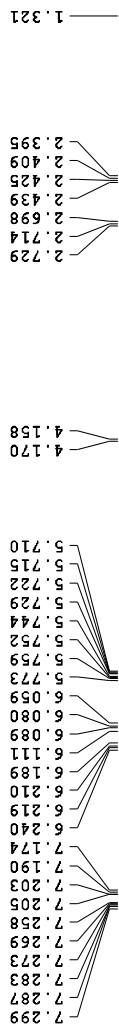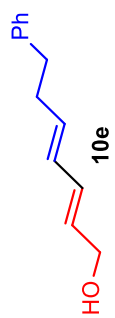

<sup>1</sup>H-NMR in CDCl<sub>3</sub> (500 MHz)

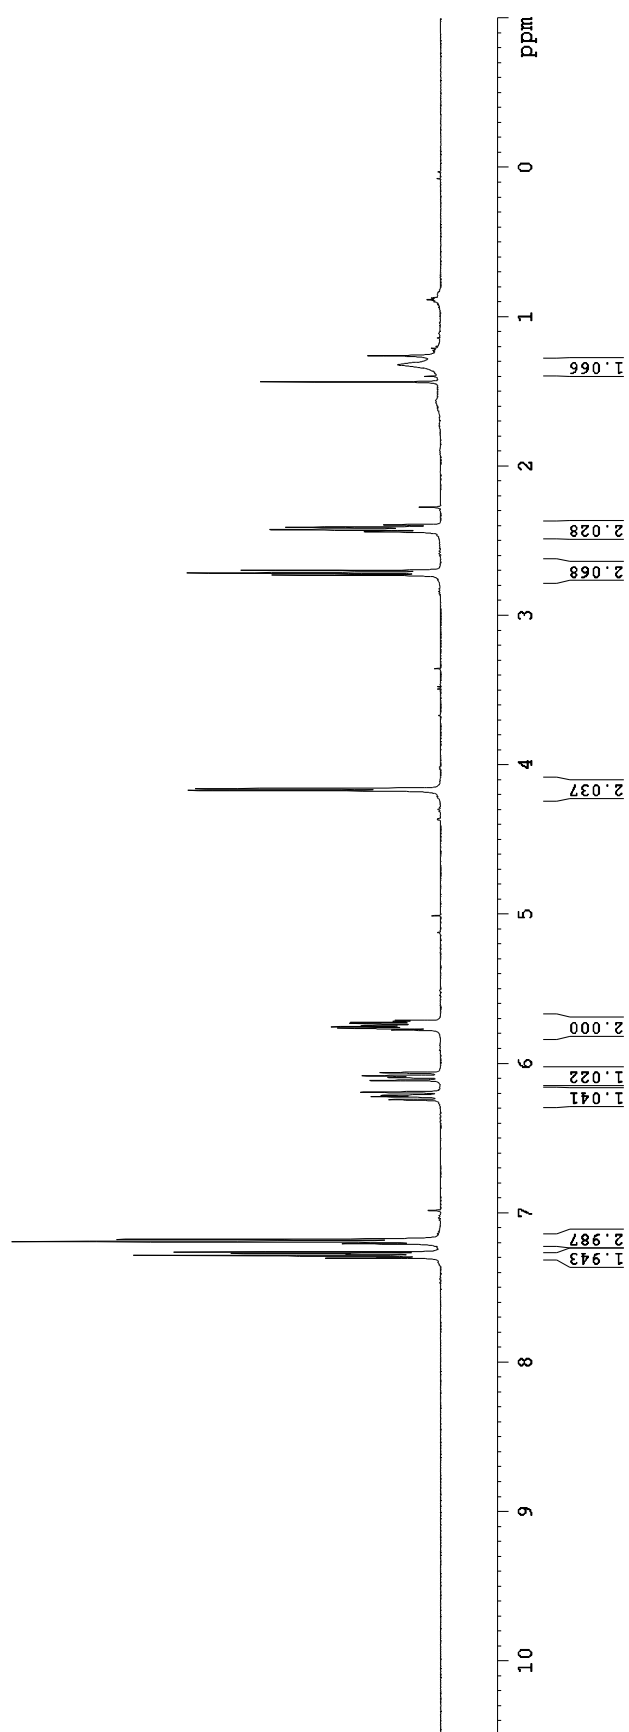

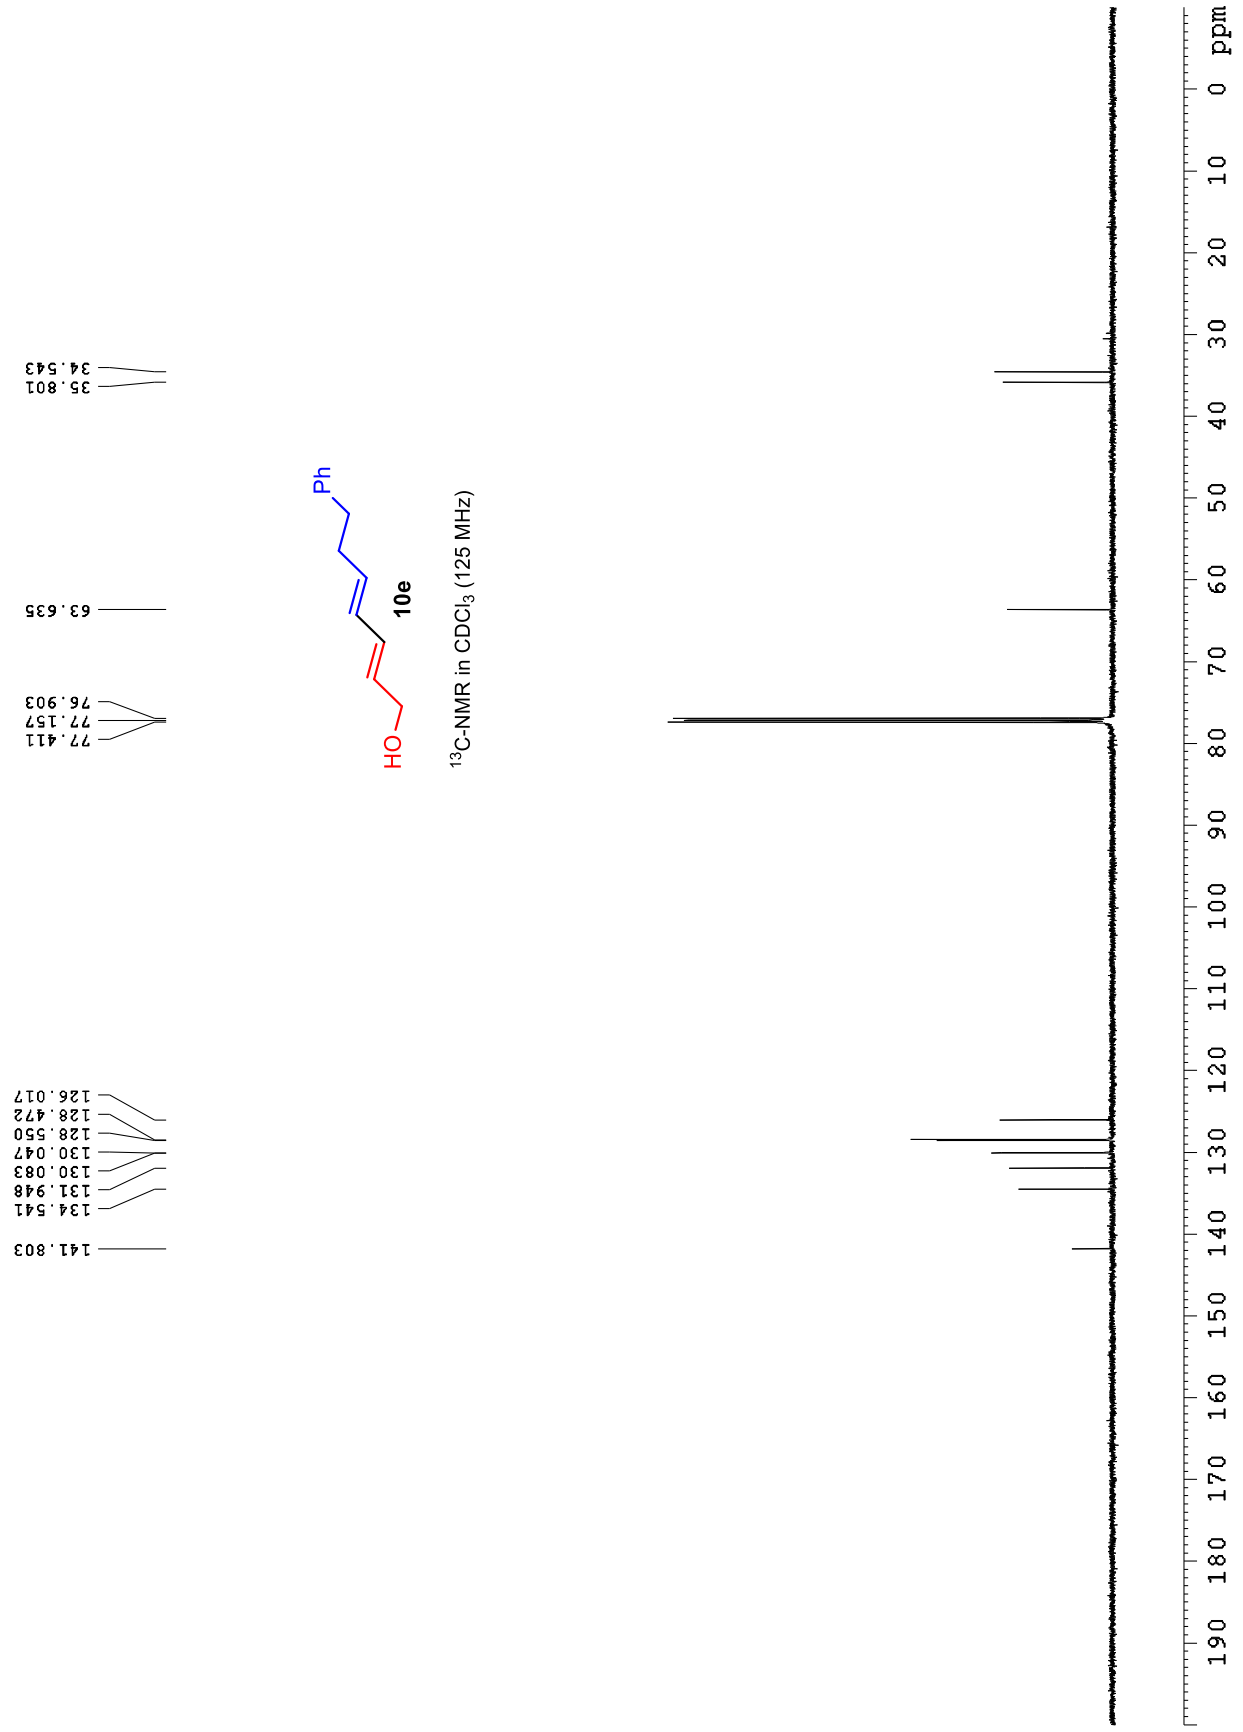

7.737  
7.720  
7.694  
7.677  
7.599  
7.584  
7.502  
7.487  
7.471  
7.442  
7.427  
7.258

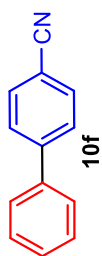

<sup>1</sup>H-NMR in CDCl<sub>3</sub> (500 MHz)

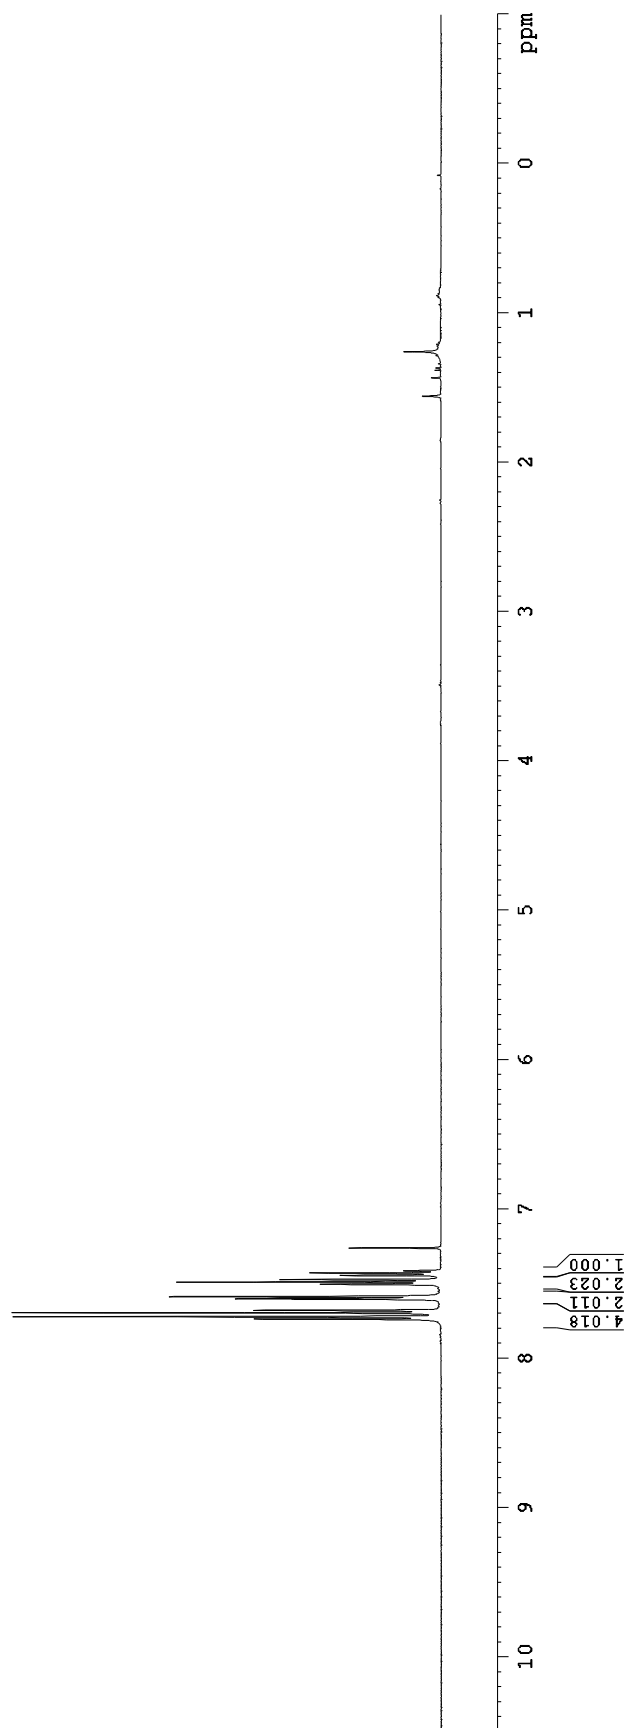

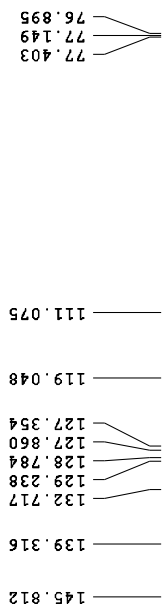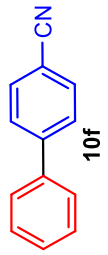

<sup>13</sup>C-NMR in CDCl<sub>3</sub> (125 MHz)

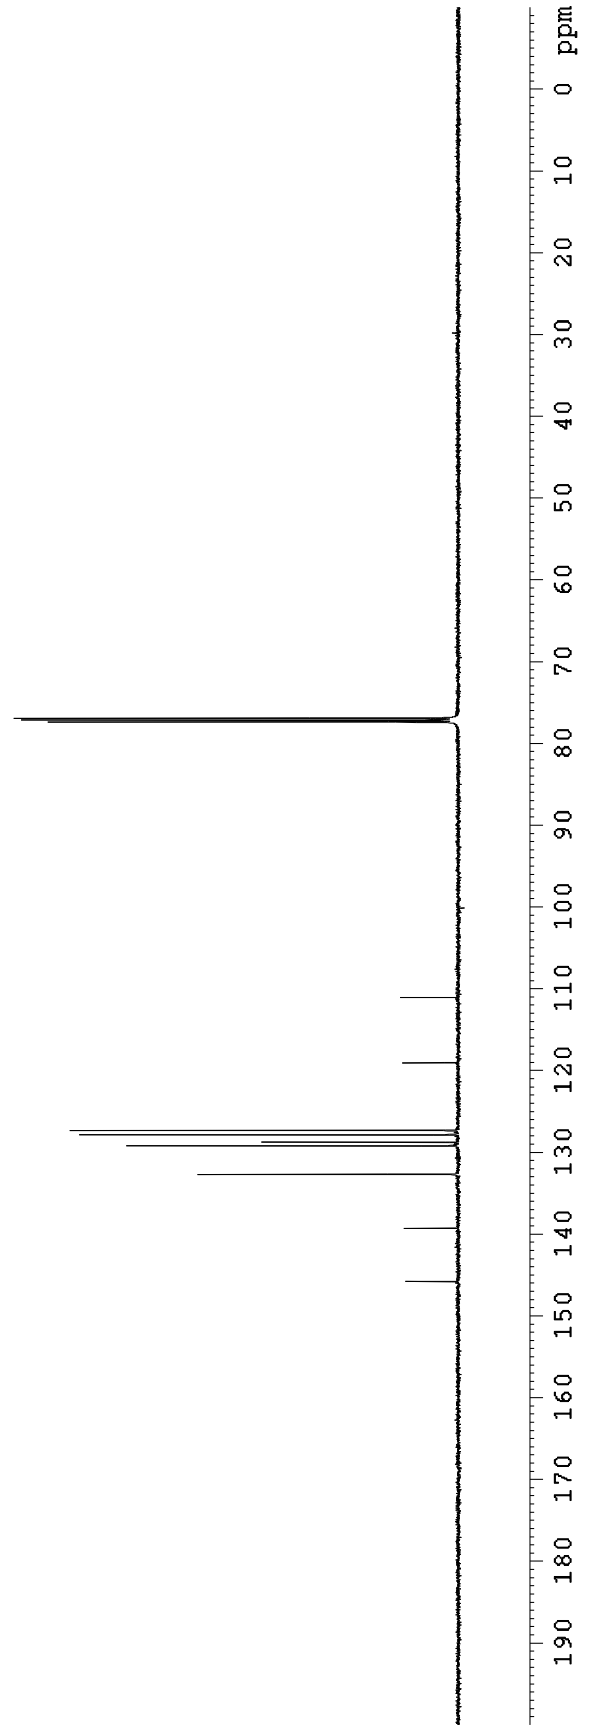

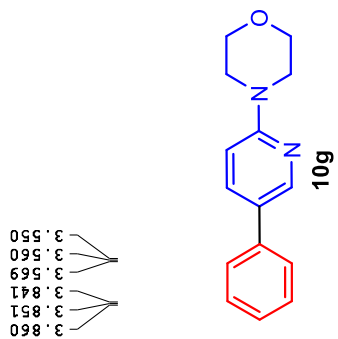

3.860  
 3.851  
 3.841  
 3.569  
 3.560  
 3.550

8.467  
 8.465  
 8.462  
 7.759  
 7.755  
 7.742  
 7.737  
 7.532  
 7.530  
 7.526  
 7.516  
 7.514  
 7.514  
 7.514  
 7.443  
 7.439  
 7.428  
 7.415  
 7.412  
 7.334  
 7.332  
 7.330  
 7.317  
 7.305  
 7.303  
 7.300  
 7.258  
 6.724  
 6.707

<sup>1</sup>H-NMR in CDCl<sub>3</sub> (500 MHz)

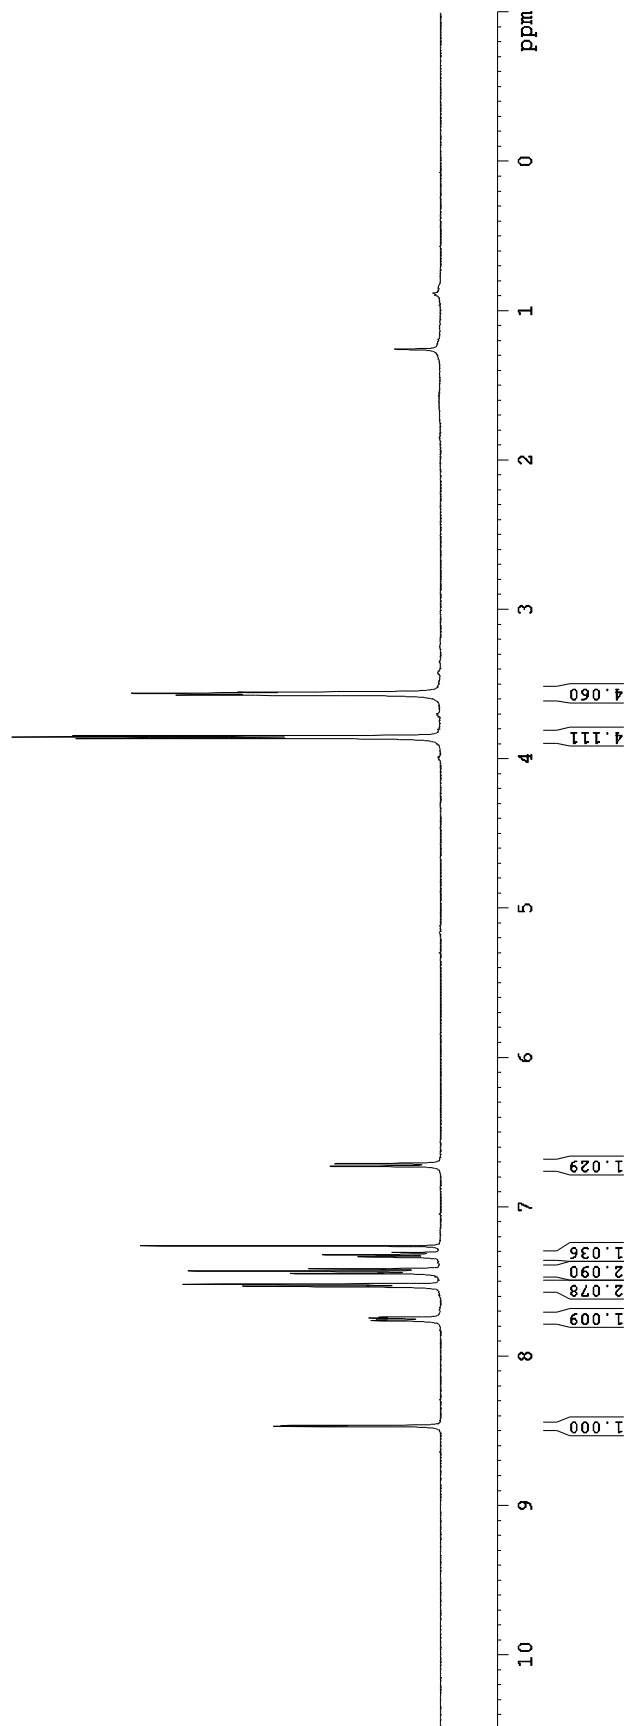

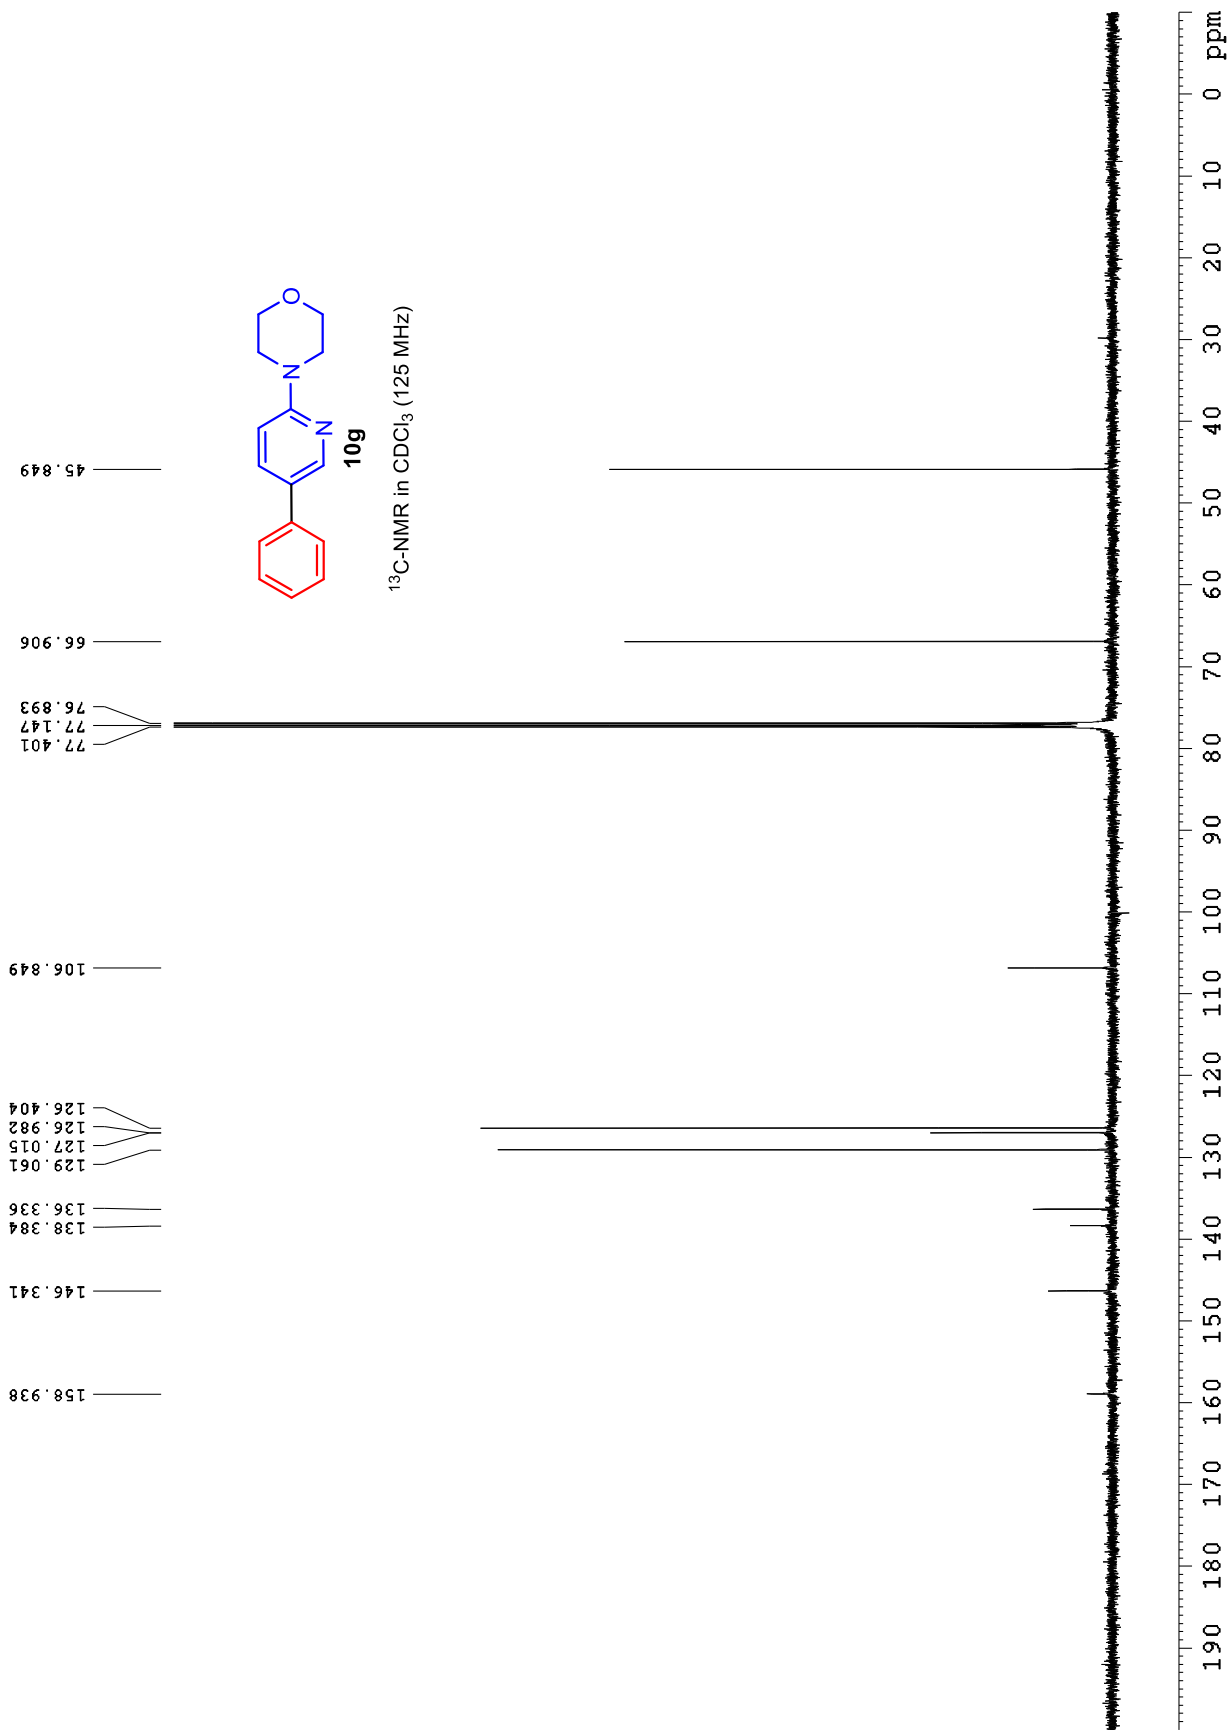

8.046  
8.029  
7.699  
7.682  
7.642  
7.640  
7.625  
7.491  
7.477  
7.461  
7.420  
7.406  
7.391  
7.258

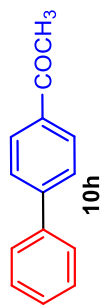

<sup>1</sup>H-NMR in CDCl<sub>3</sub> (500 MHz)

2.643

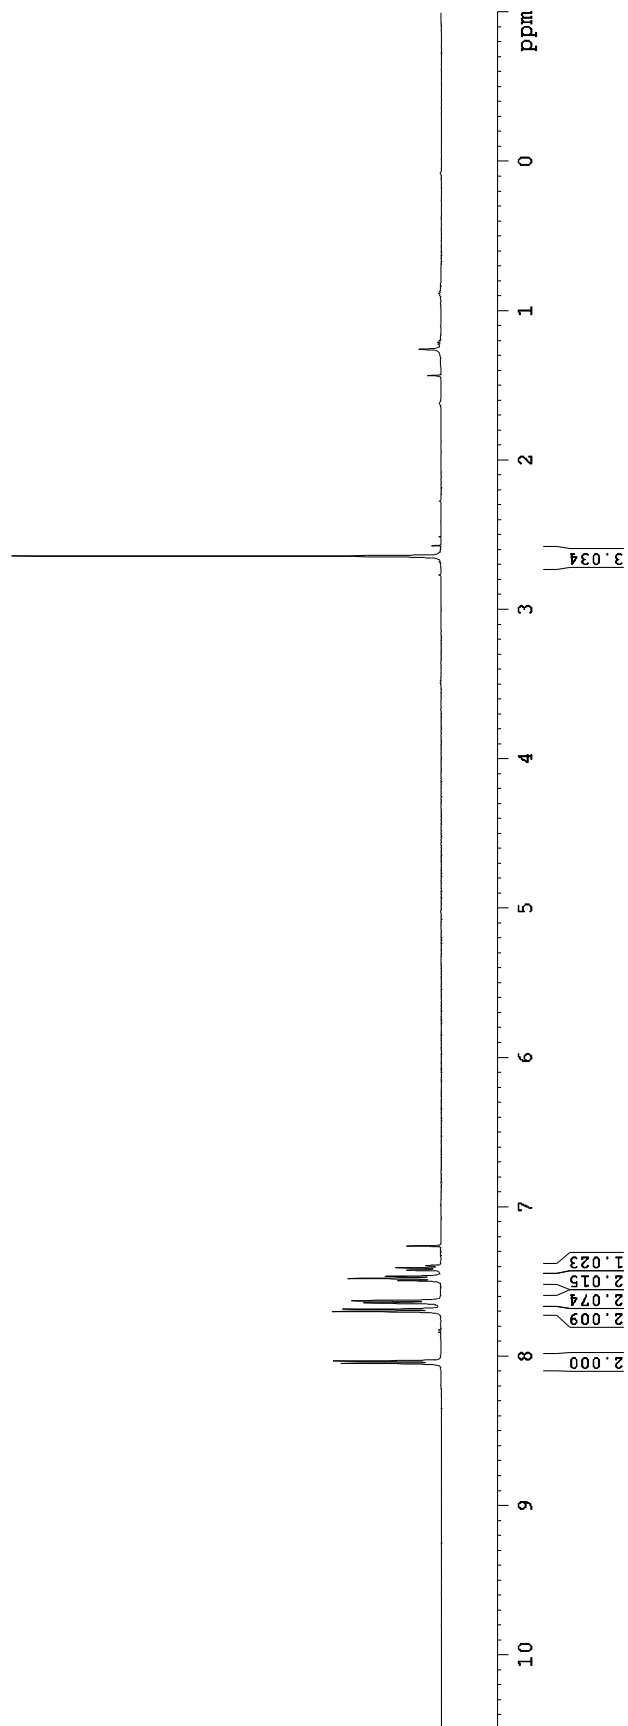

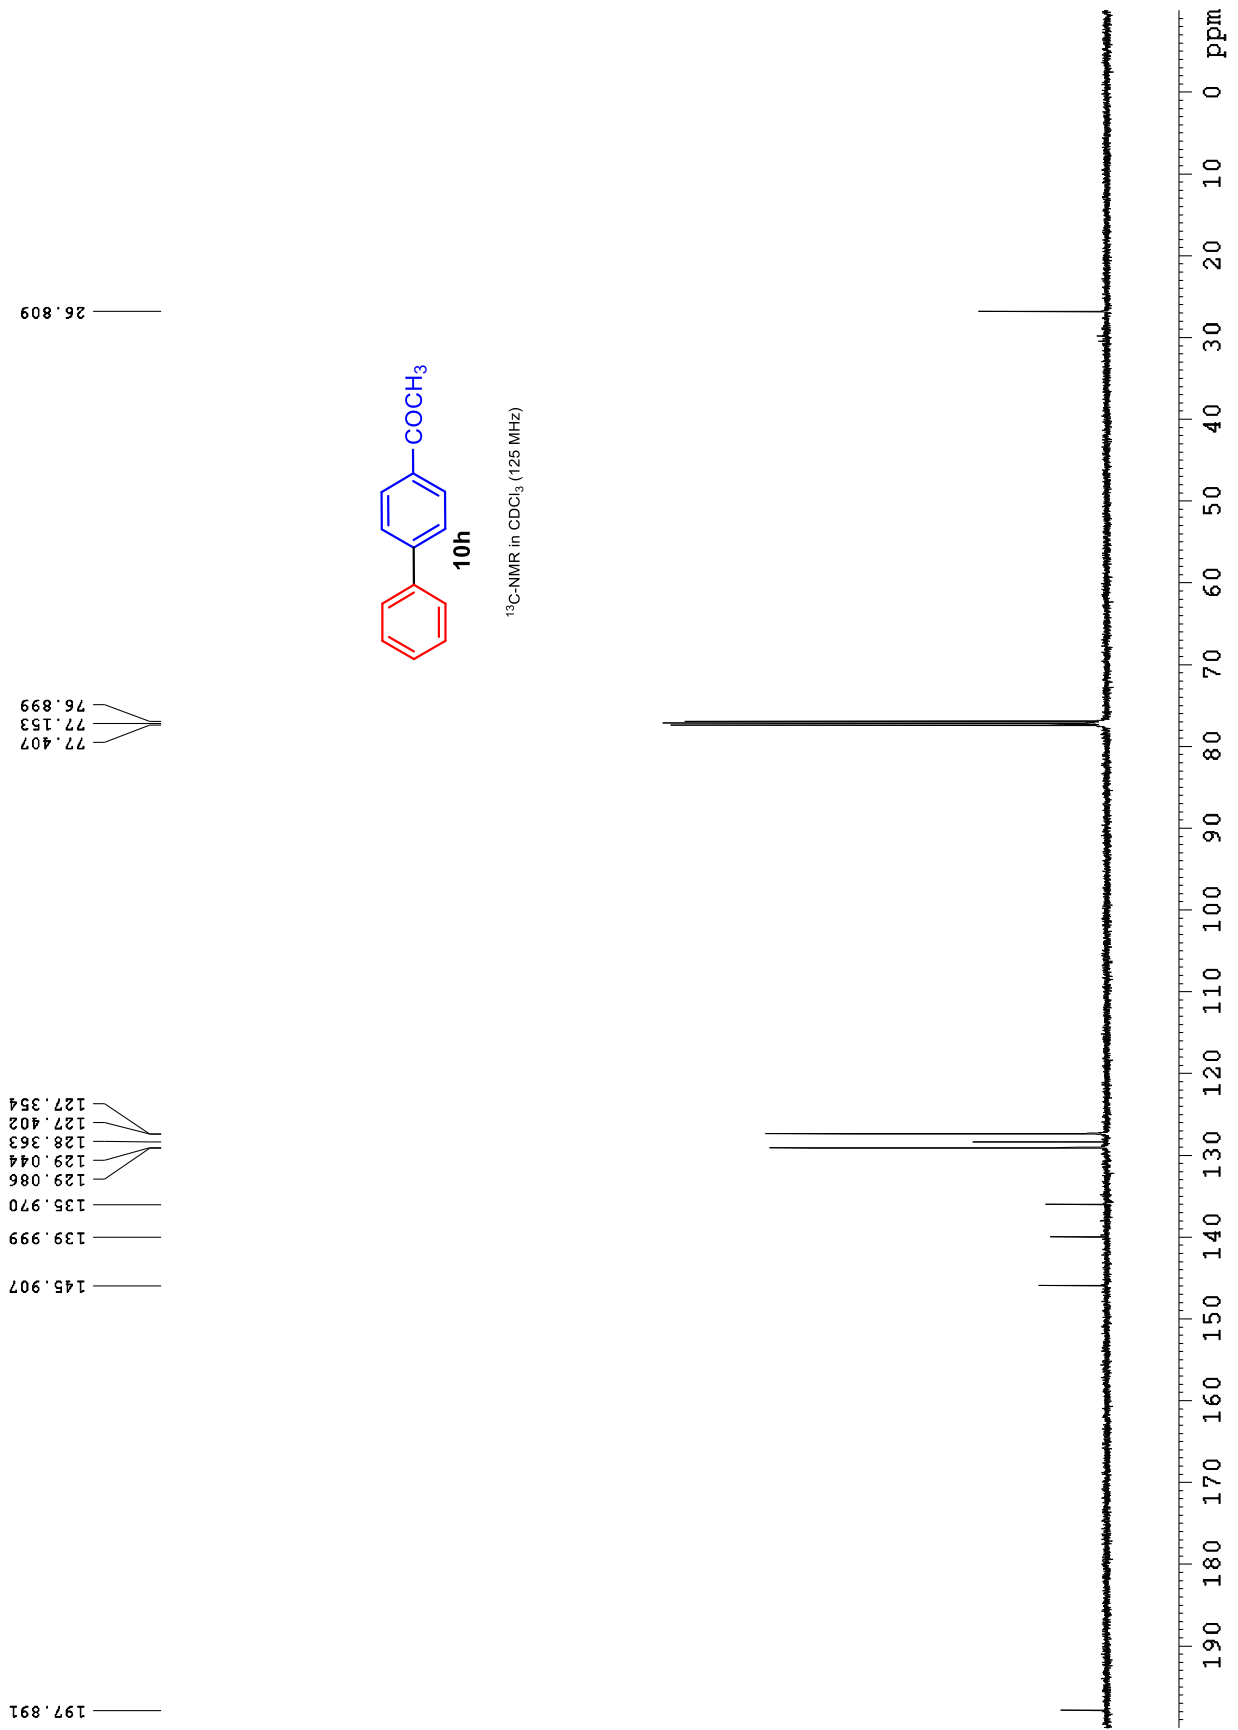

Supplement: ol5007086_si_001.pdf [file ol5007086_si_001.pdf]
